1           **Identification of novel antiviral drug candidates using an optimized**  
2                           **SARS-CoV-2 phenotypic screening platform**

3   Denisa Bojkova<sup>1</sup>, Philipp Reus<sup>1,2</sup>, Leona Panosch<sup>1</sup>, Marco Bechtel<sup>1</sup>, Tamara  
4   Rothenburger<sup>1</sup>, Joshua Kandler<sup>1</sup>, Annika Pfeiffer<sup>1</sup>, Julian U.G. Wagner<sup>3,4,5</sup>, Mariana  
5   Shumliakivska<sup>3</sup>, Stefanie Dimmeler<sup>3,4,5</sup>, Ruth Olmer<sup>6</sup>, Ulrich Martin<sup>6</sup>, Florian  
6   Vondran<sup>7,8</sup>, Tuna Toptan<sup>1</sup>, Florian Rothweiler<sup>1,9</sup>, Richard Zehner<sup>10</sup>, Holger Rabenau<sup>1</sup>,  
7   Karen L. Osman<sup>11</sup>, Steven T. Pullan<sup>11</sup>, Miles Carroll<sup>11,12,13</sup>, Richard Stack<sup>14</sup>, Sandra  
8   Ciesek<sup>1,2,8</sup>, Mark N Wass<sup>14</sup>, Martin Michaelis<sup>14\*</sup>, Jindrich Cinatl jr.<sup>1,9\*</sup>

9  
10   <sup>1</sup> Institute of Medical Virology, University Hospital, Goethe-University, Frankfurt am  
11   Main, Germany

12   <sup>2</sup> Fraunhofer Institute for Translational Medicine and Pharmacology (ITMP), Frankfurt  
13   am Main, Germany

14   <sup>3</sup> Institute for Cardiovascular Regeneration, Centre of Molecular Medicine, Goethe  
15   University, Frankfurt am Main, Germany

16   <sup>4</sup> German Center for Cardiovascular Research (DZHK), partner site Rhine-Main,  
17   Goethe University, Frankfurt am Main, Germany

18   <sup>5</sup> Cardiopulmonary Institute (CPI), Goethe University, Frankfurt am Main, Germany

19   <sup>6</sup> Leibniz Research Laboratories for Biotechnology and Artificial Organs (LEBAO),  
20   Hannover Medical School, Germany

21   <sup>7</sup> Clinic for General, Abdominal and Transplant Surgery, Hannover Medical School,  
22   Germany

23   <sup>8</sup> German Center for Infection Research, DZIF, Braunschweig, Germany

24   <sup>9</sup> Dr Petra Joh Research Institute, Frankfurt am Main, Germany

25   <sup>10</sup> Institute for Forensic Medicine, University Hospital, Goethe-University, Frankfurt am  
26   Main, Germany

27 <sup>11</sup> Public Health England, National Infection Service, Porton Down, Salisbury, UK

28 <sup>12</sup> Wellcome Trust Centre for Human Genetics, Nuffield Department of Medicine,  
29 Oxford University, Oxford, UK

30 <sup>13</sup> NIHR Health Protection Unit in Emerging and Zoonotic Infections, Department of  
31 Clinical Infection, Microbiology and Immunology, University of Liverpool, Liverpool, UK

32 <sup>14</sup> School of Biosciences, University of Kent, Canterbury, UK

33

34 \*Corresponding authors: Martin Michaelis ([M.Michaelis@kent.ac.uk](mailto:M.Michaelis@kent.ac.uk)), Jindrich Cinatl jr.  
35 ([cinatl@em.uni-frankfurt.de](mailto:cinatl@em.uni-frankfurt.de))

36

37 **Abstract**

38           Reliable, easy-to-handle phenotypic screening platforms are needed for the  
39 identification of anti-SARS-CoV-2 compounds. Here, we present caspase 3/7 activity  
40 as a read-out for monitoring the replication of SARS-CoV-2 isolates from different  
41 variants, including a remdesivir-resistant strain, and of other coronaviruses in a broad  
42 range of cell culture models, independently of cytopathogenic effect formation.  
43 Compared to other cell culture models, the Caco-2 subline Caco-2-F03 displayed  
44 superior performance, as it possesses a stable SARS-CoV-2 susceptible phenotype  
45 and does not produce false-positive hits due to drug-induced phospholipidosis. A  
46 proof-of-concept screen of 1796 kinase inhibitors identified known and novel antiviral  
47 drug candidates including inhibitors of PHGDH, CLK-1, and CSF1R. The activity of the  
48 PHGDH inhibitor NCT-503 was further increased in combination with the HK2 inhibitor  
49 2-deoxy-D-glucose, which is in clinical development for COVID-19. In conclusion,  
50 caspase 3/7 activity detection in SARS-CoV-2-infected Caco-2F03 cells provides a  
51 simple phenotypic high-throughput screening platform for SARS-CoV-2 drug  
52 candidates that reduces false positive hits.

53

54

55

## 56 **Introduction**

57           There is an ongoing search for antiviral drugs against SARS-CoV-2 that can  
58 complement the currently available monoclonal antibody preparations and the three  
59 approved small-molecule drugs remdesivir, molnupiravir, and nirmatrelvir [Gao & Sun,  
60 2021]. Effective antiviral drugs and drug combinations will be particularly important for  
61 immunocompromised individuals, who cannot effectively be protected by vaccination  
62 [Gentile & Schiano Moriello, 2022].

63           Previous research has shown that the efficacy of antiviral agents may differ  
64 between SARS-CoV-2 variants and cell culture models [Dittmar et al., 2021; Bojkova  
65 et al., 2022; Zhao et al., 2022]. Some cell culture models may produce false positive  
66 hits due to unspecific effects on the host cell metabolism such as phospholipidosis that  
67 do not translate into in vivo activity [Tummino et al., 2021]. Moreover, continued SARS-  
68 CoV-2 passaging in cell culture may change virus biology, including virus sensitivity to  
69 antiviral drugs [Ogando et al., 2020; Ramirez et al., 2021; Szemiel et al., 2021]. Thus,  
70 simple and robust cell culture assays that can cover a broad spectrum of SARS-CoV-  
71 2 variants (including primary clinical isolates) are required to accelerate the  
72 identification of anti-SARS-CoV-2 drug candidates.

73           Many assays measure SARS-CoV-2-induced host cell destruction (cytopathic  
74 effect, CPE) or host cell viability for the identification of antiviral agents [Bojkova et al.  
75 2020; Riva et al., 2020; Touret et al., 2020; Zhang et al., 2020; Ellinger et al., 2021;  
76 Van Damme et al., 2021; Yan et al., 2021a]. However, such assays are not suitable for  
77 SARS-CoV-2 culture systems that do not display virus-induced cytotoxicity [Caccuri et  
78 al., 2020; Liao et al., 2020; Bielarz et al., 2021; Wurtz et al., 2021].

79           Antibody-based detection of viral antigens and/ or double-stranded RNA is an  
80 alternative approach [Dittmar et al., 2021; Garcia et al. 2021], but requires more

81 manual handling. Assays using genetically modified cells, genetically modified SARS-  
82 CoV-2 strains, and SARS-CoV-2 replicons have also been developed [Thi Nhu Tao et  
83 al., 2020; Xie et al., 2020; He et al., 2021; Van Damme et al., 2021], but cover only the  
84 limited number of virus strains that they have been established for.

85 An ideal assay would enable high throughput screening of wild-type SARS-CoV-  
86 2 including the most current clinical isolates in all available cell culture systems in a  
87 very simple format that can be applied by many research groups. Such an assay would  
88 also enable the phenotypic resistance testing of virus isolates, which is relevant given  
89 that the use of antiviral drugs seems to be inevitably associated with the formation of  
90 resistant virus variants [Hiscox et al., 2021; Szemiel et al., 2021; Yang et al., 2022].

91 Here, we introduce an effective screening assay for the identification of  
92 compounds that inhibit SARS-CoV-2 replication based on measuring caspase 3/7  
93 activity using a one-step read-out assay (Caspase-Glo® 3/7 Assay System, Promega).  
94 This assay works across different coronaviruses including many SARS-CoV-2 strains  
95 and clinical isolates as well as across a broad range of cell culture models, including  
96 those in which SARS-CoV-2 infection does not result in a recognizable virus CPE. The  
97 Caco-2 subline Caco-2-F03 was identified as preferred cell culture model, as it is easy-  
98 to-handle, displays a stable susceptibility phenotype, and does not produce false  
99 positives due to drug-induced phospholipidosis. A validation screen of 1796 kinase  
100 inhibitors confirmed the suitability of our platform and identified 81 compounds that  
101 reduced virus-induced caspase activation by more than 90%, including known as well  
102 as novel drug candidates such as PHGDH, CLK-1, and CSFR inhibitors.

103

## 104 **Results**

### 105 **Caco-2 cells as SARS-CoV-2 infection model**

106           The human colon carcinoma Caco-2 cell line was established by Jorgen Fogh  
107 (Memorial Sloan-Kettering Cancer Center, New York) in 1974 [Fogh et al., 1977] and  
108 has been used for the cultivation of human pathogenic viruses including influenza  
109 viruses and coronaviruses since 1985 [Reigel, 1985; Collins, 1990; Chan et al., 2013a].  
110 We already used Caco-2 cells (obtained from DSMZ, Braunschweig, Germany) for the  
111 cultivation of the close SARS-CoV-2 relative SARS-CoV starting in 2003 [Cinatl et al.,  
112 2003; Cinatl et al., 2004] and they also enabled us and others to quickly cultivate  
113 SARS-CoV-2 isolates when this novel virus emerged [Bojkova et al., 2020; Bojkova et  
114 al., 2020a; Bojkova et al., 2020b; Hoehl et al., 2020; Klann et al., 2020; Toptan et al.,  
115 2020; Bojkova et al., 2021; Ellinger et al., 2021; Gower et al., 2021; Widera et al.,  
116 2021].

117           In our hands, Caco-2 cells (obtained from DSMZ, Braunschweig, Germany at  
118 the time) have been highly permissive to SARS-CoV and SARS-CoV-2 and developed  
119 a pronounced cytopathogenic effect (CPE) in response to infection with both viruses  
120 [Cinatl et al., 2003; Cinatl et al., 2004; Bojkova et al., 2020b; Bojkova et al., 2021]. In  
121 other studies, however, Caco-2 cells displayed low SARS-CoV-2 susceptibility and no  
122 CPE formation [Chu et al., 2020; Lee et al., 2020; Yeung et al., 2021].

123           To further investigate these discrepancies, we ordered fresh Caco-2 cells from  
124 the following sources: DSMZ (Braunschweig, Germany, designated as Caco-2A),  
125 Sigma (Taufkirchen, Germany, Caco-2B), and CLS (Eppelheim, Germany, Caco-2C).  
126 To discriminate our original Caco-2 cell line from these other ones, we will refer to it as  
127 Caco-2-F03 from now on.

128           An initial short tandem repeat (STR) analysis confirmed that all Caco-2 cell lines  
129 share the reference profile (Suppl. Table 1). However, Caco-2A, Caco-2B, and Caco-

130 2C cells displayed low SARS-CoV-2 permissiveness as indicated by low viral spike (S)  
 131 protein levels and a lack of CPE formation compared to Caco-2-F03 (Figure 1A, Figure  
 132 1B).  
 133

Figure 1

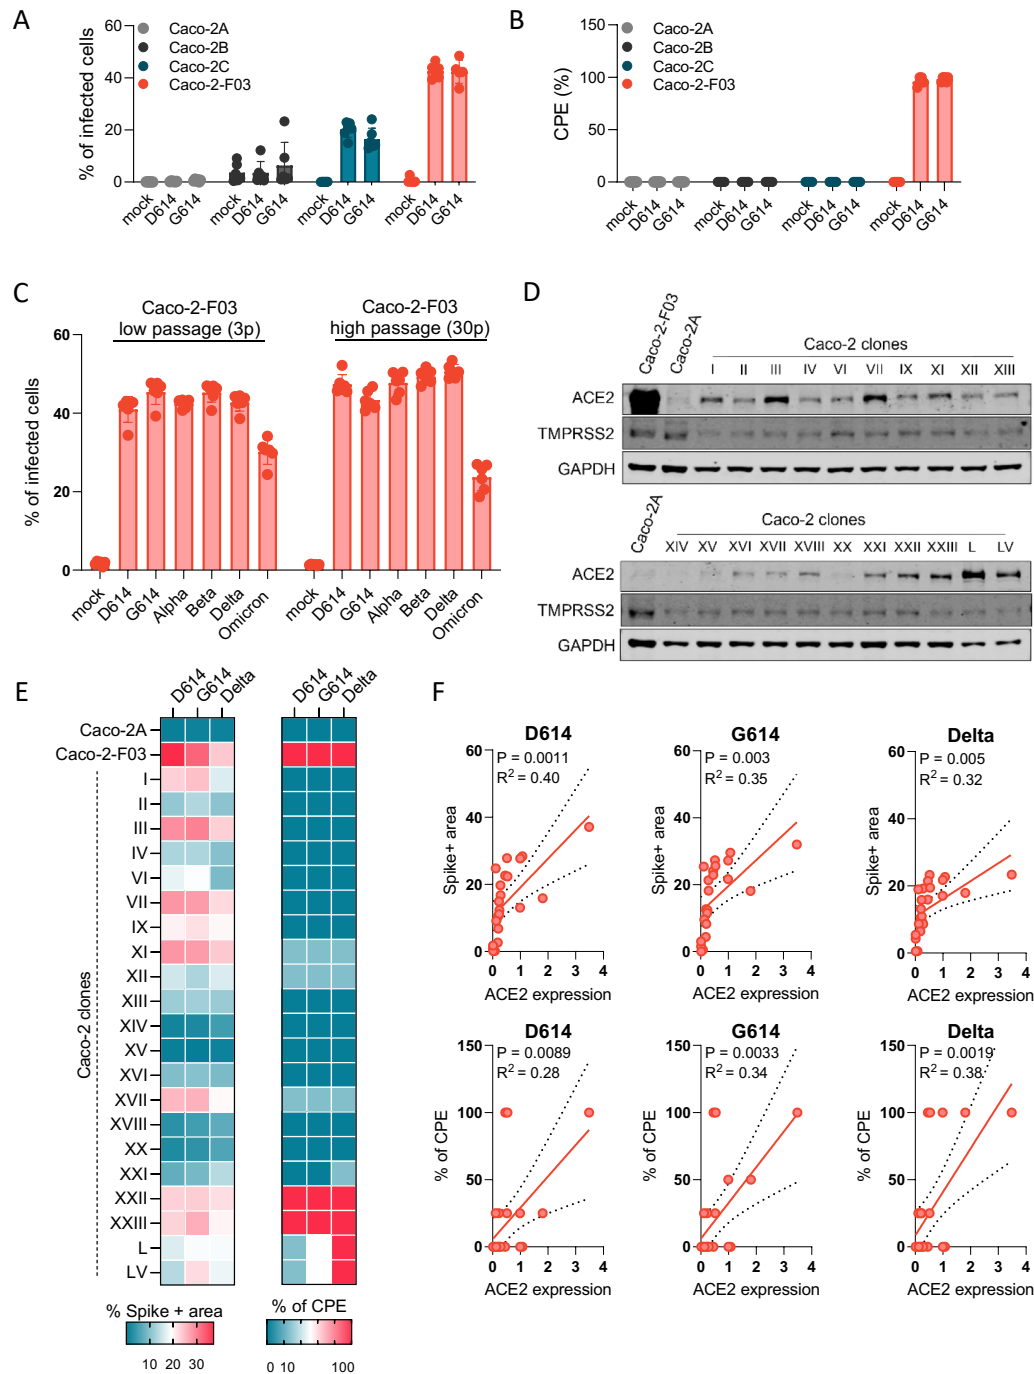

134  
 135 **Figure 1. Susceptibility of Caco-2 cells to SARS-CoV-2 infection.** A) Percentage  
 136 of SARS-CoV-2-infected cells detected in Caco-2 cell lines from different sources

137 infected with different SARS-CoV-2 isolates at a multiplicity of infection (MOI) 0.01 as  
138 determined by immunostaining for the viral spike (S protein) 48h post infection. B)  
139 Cytopathogenic effect (CPE) formation in SARS-CoV-2 (MOI 0.01)-infected Caco-2  
140 cell lines from different sources as determined 48h post infection. C) Susceptibility of  
141 Caco-2-F03 cells to a broad range of SARS-CoV-2 isolates after different times of  
142 cultivation. Cells had been frozen at passage 14 and were now resuscitated and  
143 cultivated for a further 30 passages. SARS-CoV-2 susceptibility was determined by  
144 immunostaining for S 48h after SARS-CoV-2 (MOI 0.01) infection 3 and 30 passages  
145 post resuscitation. D) ACE2 and TMPRSS2 levels in Caco-2-F03, Caco-2A, and  
146 single-cell derived clones from Caco-2A. E) Susceptibility of Caco-2A clones to  
147 selected SARS-CoV-2 isolates as indicated by immunostaining for S and CPE  
148 formation in SARS-CoV-2 (MOI 0.01)-infected cells 48h post-infection. F) Correlation  
149 of S staining and CPE formation with cellular ACE2 levels.

150

151 Caco-2-F03 cells remained permissive to SARS-CoV-2 for 30 passages after  
152 the resuscitation of cells that had been frozen at passage 14 (Figure 1C), suggesting  
153 that their SARS-CoV-2 permissiveness phenotype is stable during prolonged culturing.  
154 In agreement, we have used Caco-2-F03 cells since 2003 for the cultivation of initially  
155 SARS-CoV and later SARS-CoV-2 [Cinatl et al., 2003; Cinatl et al., 2004; Bojkova et  
156 al., 2020b; Bojkova et al., 2021].

157 Further investigations revealed that Caco-2-F03 cells display high levels of the  
158 cellular SARS-CoV and SARS-CoV-2 receptor ACE2 and the protease TMPRSS2,  
159 which cleaves and activates S for ACE2 binding [Hoffmann et al., 2020], than Caco-  
160 2A, Caco-2B, and Caco-2C (Figure 1D, Suppl. Figure 1).

161



## 162 **The Caco-2A cell line contains SARS-CoV-2-susceptible subpopulations**

163 One explanation for these differences between Caco-2-F03 and Caco-2A,  
164 Caco-2B, and Caco-2C is that we may have inadvertently enriched a SARS-CoV-2-  
165 permissive subpopulation during Caco-2 cultivation. To test this hypothesis, we  
166 established 21 single cell-derived clones from Caco-2A by limited dilution. Four of  
167 these clonal sublines were highly susceptible to SARS-CoV-2 infection as  
168 demonstrated by high S protein levels and CPE formation (Figure 1E), supporting the  
169 hypothesis that Caco-2-F03 has been derived from a SARS-CoV- and SARS-CoV-2-  
170 permissive subpopulation of our original Caco-2 cell line. There was some level of  
171 correlation between the SARS-CoV-2 susceptibility of Caco-2A clones and the cellular  
172 ACE2 levels (Figure 1F) but not between SARS-CoV-2 susceptibility and the cellular  
173 TMPRSS2 levels (Suppl. Figure 1). This suggests that ACE2 levels are more important  
174 for the SARS-CoV-2 susceptibility of Caco-2 cells than TMPRSS2 levels and that  
175 additional mechanisms are also likely to be involved.

176

## 177 **Caspase 3/7 activity for the quantification of the replication of SARS-CoV-2 and** 178 **other coronaviruses**

179 Coronavirus replication, including that of SARS-CoV-2, has been shown to  
180 result in the activation of caspases including the initiator caspases 8 and 9 and the  
181 effector caspase 3 [Conolly & Fearnhead, 2017; Bojkova et al. 2020a; Bojkova et al.  
182 2020b; Li et al., 2020; Ren et al., 2020].

183 Quantification of caspase activity in Caco-2-F03 cells infected with different  
184 SARS-CoV-2 isolates at a multiplicity of infection (MOI) of 0.01 48h post infection using  
185 the Caspase-Glo assay kit (Promega) resulted in substantially higher signal-to-basal  
186 (S/B) ratios for caspase-3/7 (5.9- to 7.7-fold) than for caspase-8 (1.3- to 1.6-fold) and  
187 caspase-9 (1.5- to 2.2-fold) (Figure 2A). Caspase 3/7 activity also resulted in higher Z'

188 scores (0.7-0.9) than caspase 8 (0.5-0.7) and caspase 9 (0.3-0.8) activity (Figure 2A),  
 189 indicating higher assay robustness [Zhang et al., 1999]. Hence, caspase 3/7 activity  
 190 detection was selected for further investigation as potential screening endpoint  
 191 method.  
 192

Figure 2

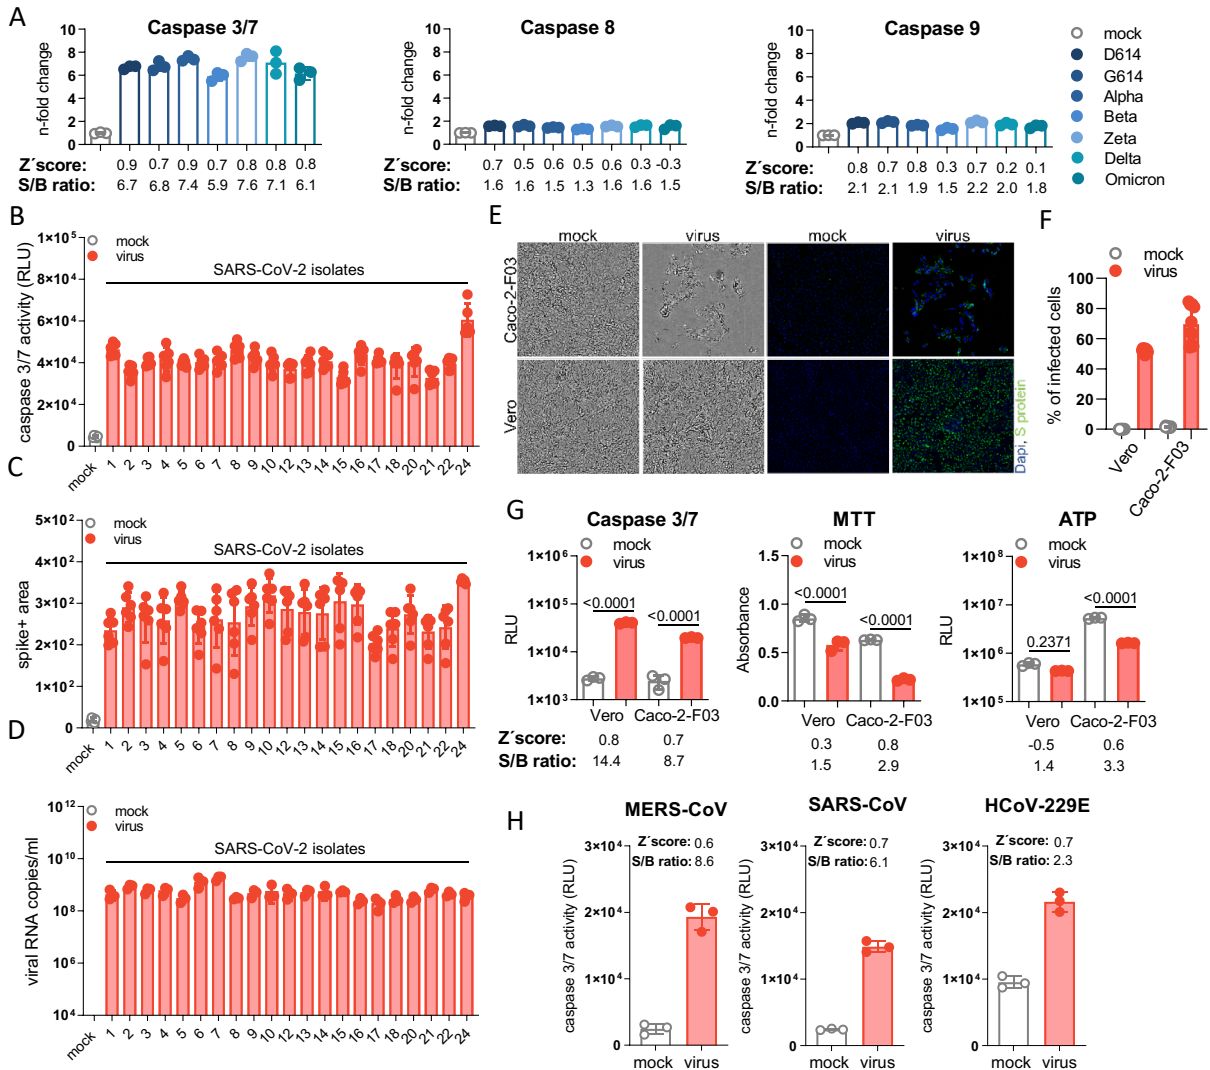

193  
 194 **Figure 2. Caspase 3/7 activity for the quantification of the replication of SARS-**  
 195 **CoV-2 and other coronaviruses.** A) Caspase 3/7, caspase 8, and caspase 9 activity  
 196 in Caco-2-F03 cells infected with a range of different SARS-CoV-2 isolates (MOI 0.01),  
 197 as determined by Caspase-Glo assay (Promega) 48h post infection. Higher  
 198 signal-to-basal (S/B) ratios and Z' scores indicate higher assay robustness. B)

199 Caspase 3/7 activity as determined by Caspase-Glo assay, C) SARS-CoV-2 Spike (S)  
200 protein staining, and D) virus titers as indicated by genomic RNA copy numbers  
201 determined by qPCR in Caco-2-F03 cells infected with a wide range of uncharacterized  
202 SARS-CoV-2 isolates (MOI 0.01) 48h post infection. E) Representative images  
203 indicating CPE formation in G614 (MOI 0.01)-infected Caco-2-F03 and Vero cells 48h  
204 post infection as indicated by phase contrast microscopy and immunofluorescence  
205 staining for the viral S protein in combination with DAPI-stained nuclei. F)  
206 Quantification of cellular S protein levels in Caco-2-F03 cells infected with G614 (MOI  
207 0.01) 48h post infection by immunostaining. G) Only caspase 3/7 activity but not  
208 viability assays (MTT, CellTiter-Glo measuring ATP production) reflects G614 (MOI  
209 0.01) replication 48h post infection in Vero cells, which do not display a virus-induced  
210 CPE. G614 (MOI 0.01)-infected Caco-2-F03 cells served as a control that displays a  
211 CPE. P values were calculated by one-way ANOVA. H) Caspase 3/7 activity in Caco-  
212 2-F03 cells infected with MERS-CoV, SARS-CoV, and HCoV-229E (MOI 0.01) as  
213 determined 48h post infection including S/B ratios and Z' scores.

214

215 Caspase 3/7 activity displayed an MOI-dependent increase in Caco-2-F03 cells  
216 24 h post infection (Suppl. Figure 2A), which mirrored CPE formation (Suppl. Figure  
217 2B). 48h post infection, such differences were not detectable anymore (Suppl. Figure  
218 2A, Suppl. Figure 2B). Moreover, infection of Caco-2-F03 cells with an additional 21  
219 clinical SARS-CoV-2 isolates (after a maximum of two passages in Caco-2-F03 cells)  
220 also resulted in effective caspase 3/7 activation (Figure 2B), which reflected viral spike  
221 (S) protein levels and virus titers (as indicated by genomic RNA copy numbers) (Figure  
222 2C, Figure 2D). UV-inactivated virus did not cause caspase 3/7 activation (Suppl.

223 Figure 2C), further confirming that SARS-CoV-2-induced caspase 3/7 activation  
224 depends on virus replication.

225 However, caspase 3/7 activation does not appear to be critically involved in  
226 SARS-CoV-2 replication as the clinically approved pan-caspase inhibitor emricasan  
227 [Shiffman et al., 2010] did not interfere with SARS-CoV-2 replication and CPE  
228 formation, despite suppressing caspase 3/7 activity (Suppl. Figure 3).

229

### 230 **Caspase 3/7 activity for the monitoring of SARS-CoV-2 replication in the** 231 **presence and absence of a virus-induced cytopathogenic effects (CPE)**

232 The caspase 3/7 assay also enabled the monitoring of SARS-CoV-2 replication  
233 in Vero cells, in which SARS-CoV-2 does not induce a CPE and in which SARS-CoV-  
234 2 replication cannot be monitored by viability assays such as the MTT assay (measures  
235 oxidative phosphorylation in the mitochondria) and the Cell TiterGlo assay (Promega,  
236 measures cellular ATP production) (Figure 2E-G).

237

### 238 **Caspase 3/7-induction by additional coronaviruses**

239 Caspase 3/7 activity also indicated replication of the additional human-  
240 pathogenic coronaviruses SARS-CoV, MERS-CoV, and HCoV-229E in CaCo-2-F03  
241 cells in Caco-2-F03 cells (Figure 2H).

242

243 **Caspase 3/7 activity for the monitoring of SARS-CoV-2 replication in primary**  
244 **human cell cultures**

245 Furthermore, SARS-CoV-2-induced caspase 3/7 activity was detected in  
246 primary cultures of normal human cells, including induced pluripotent stem cell-derived  
247 cardiomyocytes (CMS), air liquid interface (ALI) cultures of bronchial epithelial (HBE)  
248 cells, and hepatocytes (PHH) (Suppl. Figure 4A). Immunoblots for the viral  
249 nucleoprotein (NP) were used to confirm SARS-CoV-2 infection in these primary cell  
250 cultures (Suppl. Figure 4B). ALI HBE did not display disruption of cellular barrier during  
251 SARS-CoV-2 infection as measured by transepithelial electrical resistance (TEER) and  
252 LDH release (Suppl. Figure 4C and D), whereas CMS and PHH displayed a CPE in  
253 response to SARS-CoV-2 infection (Suppl. Figure 4E and F). This agrees with our  
254 previous results that caspase 3/7 activity is a suitable read-out method for monitoring  
255 SARS-CoV-2 infection both in the presence and absence of a virus-induced CPE.

256 Taken together, detection of caspase 3/7 activity does not only enable the  
257 monitoring of the replication of a wide range of SARS-CoV-2 variants and clinical  
258 isolates (and of other coronaviruses). It is also a suitable read-out for SARS-CoV-2  
259 replication across many different susceptible permanent cell lines and human primary  
260 cultures, independently of whether SARS-CoV-2 induces a CPE in these systems.

261

262 **Caspase 3/7 activity for the identification of antiviral drugs**

263 Next, we compared caspase 3/7 activity and S protein staining for the detection  
264 of the antiviral activity of drugs with known efficacy against SARS-CoV-2, including  
265 remdesivir (RNA-dependent RNA polymerase (RdRp) inhibitor), EIDD-1931 (active  
266 form of molnupiravir that induces ‘error catastrophe’ in newly produced SARS-CoV-2  
267 genomes), ribavirin (broad-spectrum antiviral drug), nirmatrelvir (3C-like protease/

268 main protease inhibitor), and nafamostat (TMPRSS2 inhibitor) [Apaydin et al., 2021;  
 269 Simonis et al., 2021] in SARS-CoV-2 variant G614-infected Caco-2-F03 cells. Both  
 270 detection methods resulted in very similar IC50s (concentrations that inhibit virus  
 271 activity by 50%) (Figure 3A).  
 272

Figure 3

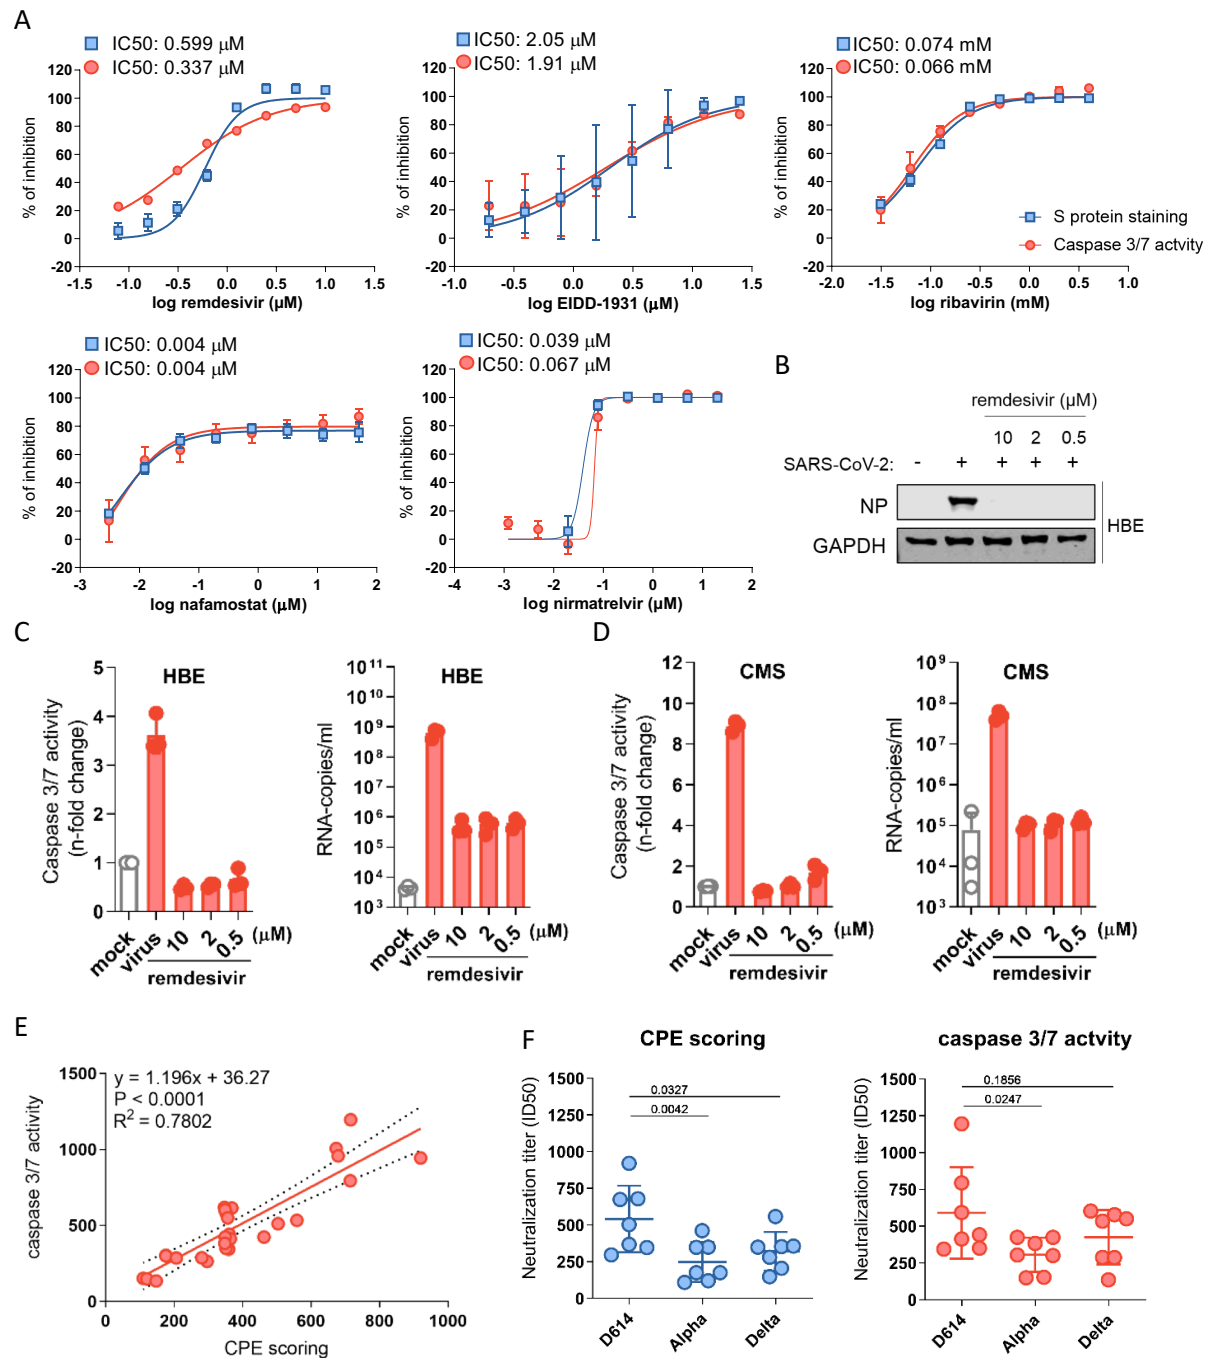

273

274 **Figure 3. Caspase 3/7 activity for the determination of the antiviral activity of**  
275 **anti-SARS-CoV-2 agents and neutralization assays.** A) Dose-response curves and  
276 concentrations that inhibit virus infection by 50% (IC50) of antiviral agents as  
277 determined by caspase 3/7 activity and immunostaining for the coronavirus S protein  
278 in G614 (MOI 0.01)-infected Caco-2-F03 cells 24h post infection. B) Effects of the  
279 approved anti-SARS-CoV-2 drug remdesivir on cellular levels of the viral NP protein in  
280 G614 (MOI 1)-infected air liquid interface (ALI) cultures of primary human bronchial  
281 epithelial (HBE) cells 120h post infection. C) Effects of remdesivir on caspase 3/7  
282 activity and virus titers (genomic RNA copy numbers determined by PCR) in G614  
283 (MOI 1)-infected ALI HBE cultures 120h post infection. D) Effects of remdesivir on  
284 caspase 3/7 activity and virus titers in G614 (MOI 1)-infected primary human  
285 cardiomyocytes (CMS) 48h post infection. E) Correlation of the neutralization capacity  
286 of sera derived from seven donors two weeks after their second dose of the mRNA-  
287 1273 vaccine determined by caspase 3/7 activity or cytopathogenic effect (CPE)  
288 scoring in D614, Alpha and Delta-infected Caco-2-F03 cells 48h post infection. F)  
289 Determination of neutralization titers by caspase 3/7 activity or CPE scoring using sera  
290 derived from seven donors two weeks after their second dose of the mRNA-1273  
291 vaccine in Caco-2-F03 cells infected with D614, Alpha, and Delta isolates 72h post  
292 infection. P values were calculated using paired t-test.

293

294 Caspase 3/7 activity also enabled the monitoring of the antiviral activity of  
295 remdesivir in SARS-CoV-2-infected primary ALI HBE and HNE cell cultures that do not  
296 display a recognizable CPE. The validity of the results obtained by caspase 3/7 assay  
297 was confirmed by determining virus titers and Western Blot analysis of SARS-CoV-2  
298 N protein levels (Figure 3B,C). Finally, caspase 3/7 activity reflected the effect of  
299 remdesivir on SARS-CoV-2 replication in CMS (Figure 3D).

300 Taken together, these findings demonstrate that caspase 3/7 activity enables  
301 the monitoring of the antiviral drug response in a broad range of cell culture models.

302

### 303 **Caspase 3/7 activity for the determination of neutralizing antibody titers**

304 Caspase 3/7 activity also enabled the determination of neutralizing antibody  
305 titers in sera derived from seven donors two weeks after their second dose of the  
306 mRNA-1273 vaccine, as indicated by a close correlation with results obtained by CPE  
307 scoring in Caco-2-F03 cells infected with different SARS-CoV-2 variants (Figure 3E,  
308 F). The neutralization capacity of the sera was higher against the early SARS-CoV-2  
309 strain FFM3 (G614) than against Alpha (B.1.1.7) and Gamma (P.2) variant isolates  
310 (Figure 3F), which is in line with the immune evasion properties documented for these  
311 variants [Zhang et al., 2021].

312

### 313 **Caspase 3/7 activity for detection of SARS-CoV-2 resistance**

314 Next, we tested whether the caspase 3/7 activity assay may be used for  
315 phenotypic screens identifying resistant virus strains. To establish a drug-resistant  
316 strain, SARS-CoV-2 strain FFM3 (G614) was passaged in the presence of increasing  
317 remdesivir concentrations starting with 0.5  $\mu$ M (the IC<sub>50</sub> concentration) until it could  
318 be cultivated in the presence of remdesivir 2 $\mu$ M (FFM3'REM). FFM3'REM displayed a  
319 significantly reduced sensitivity to remdesivir, as indicated by determination of cellular  
320 S levels in Caco-2-F03 and Calu-3 cells (Figure 4A) and by caspase 3/7 activity in  
321 Caco-2-F03 cells (Figure 4B). Interestingly, this remdesivir-resistant strain displayed  
322 increased sensitivity to EIDD-1931 and ribavirin relative to the parental strain (Figure  
323 4A,B).

324



Figure 4

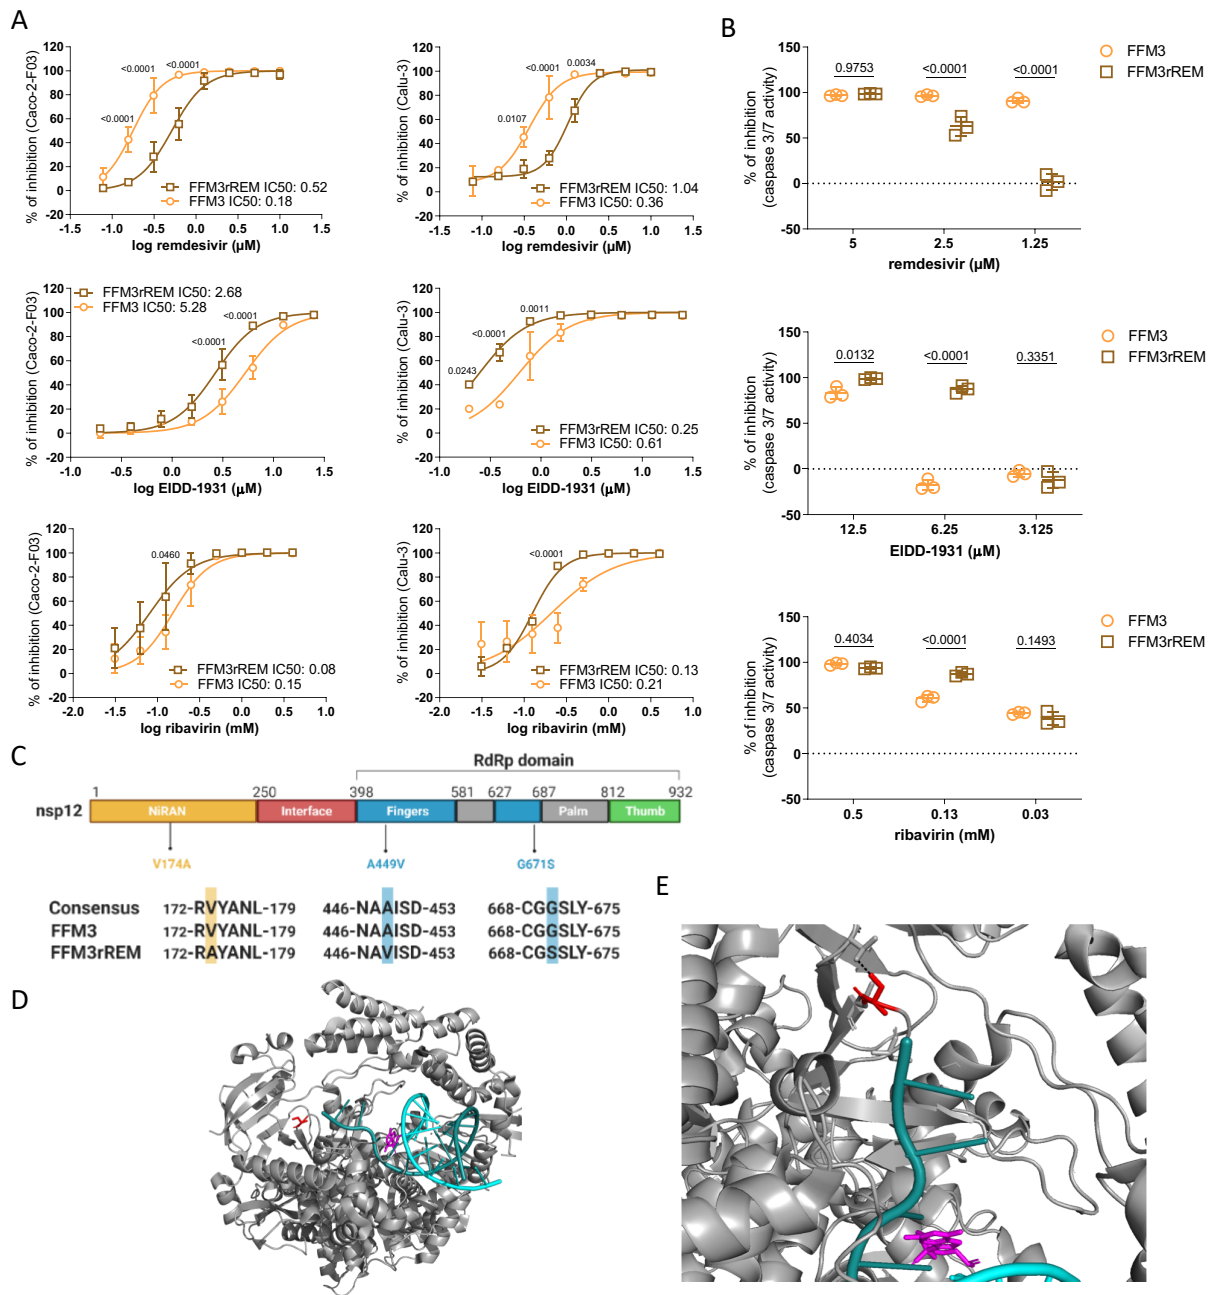

325

326 **Figure 4. Caspase 3/7 activity for the phenotypic resistance testing of SARS-**

327 **CoV-2 strains.** A) Drug dose response curves and concentrations that reduce cellular

328 levels of the SARS-CoV-2 S protein by 50% (IC<sub>50</sub>) in Caco-2-F03 and Calu-3 cells as

329 determined by immunostaining 24h (Caco-2-F03) or 48h (Calu-3) post infection with

330 the SARS-CoV-2 strain FFM3 or its remdesivir-adapted substrain FFM3rREM at MOI

331 0.01. B) Drug concentrations that reduce caspase 3/7 activity in FFM3 and FFM3rREM

332 (MOI 0.01)-infected Caco-2-F03 cells 48h post infection. C) Sequence variants in  
333 FFM3rREM compared to FFM3. D) The polymerase complex with nsp7 and nsp8 and  
334 a template-primer RNA (cyan and deep teal) and remdesivir (magenta) bound.  
335 Gly671Ser is shown in red (as serine). E) The SARS-CoV-2 polymerase Gly671Ser  
336 sequence variant. Residue 671 is shown in red as serine, which would be able to form  
337 a hydrogen bond with Thr402 which would not be present as Gly671. All p values were  
338 calculated by two-way ANOVA.

339

340         Sequencing of FFM3rREM identified a 154452G>A mutation (present in >90%  
341 of alleles) in the coding region of the RNA-dependent RNA polymerase, which results  
342 in a change from glycine to serine in position 671(Gly671Ser) (Figure 4C). Gly671Ser  
343 is located in the polymerase domain of the RNA-dependent RNA polymerase in close  
344 vicinity to where RNA leaves (or enters) the active site (Figure 4D). Gly671Ser could  
345 have an effect on the protein structure, as it is located in a bend between two beta  
346 sheets, where glycine often has an important role. Additionally, Gly671Ser introduces  
347 a side chain capable of forming a hydrogen bond with Thr402 on an adjacent loop  
348 (Figure 4E), which could have an effect on the flexibility and conformation of the  
349 protein. Therefore, Gly671Ser seems likely to reduce either the binding affinity for  
350 remdesivir or to enable the polymerase to overcome the effect of the drug.

351         Although our structural analysis plausibly explains why Gly671Ser in the RNA-  
352 dependent RNA polymerase is likely to mediate remdesivir resistance, it would have  
353 been impossible to determine this as a resistance variant without the prior knowledge  
354 that the change had happened in response to SARS-CoV-2 adaptation to remdesivir.  
355 Hence, this finding emphasizes the relevance of phenotypic assays for the  
356 identification of resistant strains that cannot be identified by the analysis of viral  
357 genomic information and the subsequent elucidation of the underlying resistance

358 mechanisms. Notably, the caspase 3/7 activity assay also provides an easy-to-use  
359 read-out for such phenotypic virus resistance testing approaches.

360

### 361 **Comparison of Caco-2F03 with other cell line candidates for the identification of** 362 **anti-SARS-CoV-2 drug candidates in screening assays**

363 Next, we directly compared Caco-2F03 to other SARS-CoV-2 cultivation models  
364 that could be used for the identification of anti-SARS-CoV-2 drug candidates in  
365 screening assays. We focused on permanent cell lines that are easy to cultivate and  
366 maintain.

367 Suitable cell line candidates should be highly permissive for a broad spectrum  
368 of SARS-CoV-2 variants and display high caspase 3/7 activity upon infection. We had  
369 already shown that Caco-2-F03 cells display high susceptibility to a broad range of  
370 SARS-CoV-2 isolates (Figure 2). Here, we directly compared the susceptibility of  
371 A549-ACE2, Calu-3, Vero, and Caco-2-F03 cells to D614, G614, Alpha, Beta, and  
372 Delta isolates. S immunostaining and caspase 3/7 activity showed that Caco-2-F03  
373 displayed the most pronounced broad-spectrum permissiveness to all tested SARS-  
374 CoV-2 isolates (Suppl. Figure 5A, 5B).

375 Recently, drug-induced phospholipidosis was demonstrated to affect antiviral  
376 screens by causing false positive hits due to unspecific effects that do not translate  
377 into the clinical setting [Tummino et al., 2021]. In particular, cationic amphiphilic drugs  
378 such as hydroxychloroquine were found to induce phospholipidosis [Tummino et al.,  
379 2021]. Hence, SARS-CoV-2 culture systems for phenotypic antiviral screening would  
380 ideally avoid false positives due to phospholipidosis.

381 Treatment with hydroxychloroquine resulted in considerable phospholipidosis  
382 and inhibited a Delta isolate in A549-ACE2 and Vero cells but not in Calu-3 or CaCo-  
383 2-F03 cells (Suppl. Figure 5C, 5D). Due to the susceptibility to the broadest range of

384 SARS-CoV-2 isolates and the insensitivity to drug-induced phospholipidosis, we  
385 selected Caco-2-F03 cells for a proof-of-concept screen for anti-SARS-CoV-2 drug  
386 candidates.

387

388 **Proof-of-concept kinase inhibitor screen for drug candidates that inhibit SARS-**  
389 **CoV-2 replication**

390 Next, we used the caspase 3/7 activity assay in Caco-2F03 cells to screen the  
391 Kinase Inhibitor Library (96-well)-L1200 (Selleck) for anti-SARS-CoV-2 drug  
392 candidates (Figure 5A, Suppl. File 1). All compounds were tested at a concentration of  
393 10 $\mu$ M. Z'scores were determined as quality controls on all plates as previously  
394 described [Xu et al., 2016], and only plates with a Z'score  $\geq$  0.5 were further analyzed  
395 (Figure 5B). Moreover, remdesivir (10  $\mu$ M) was used as positive control on each plate  
396 and produced consistent results (Figure 5B).

397

Figure 5

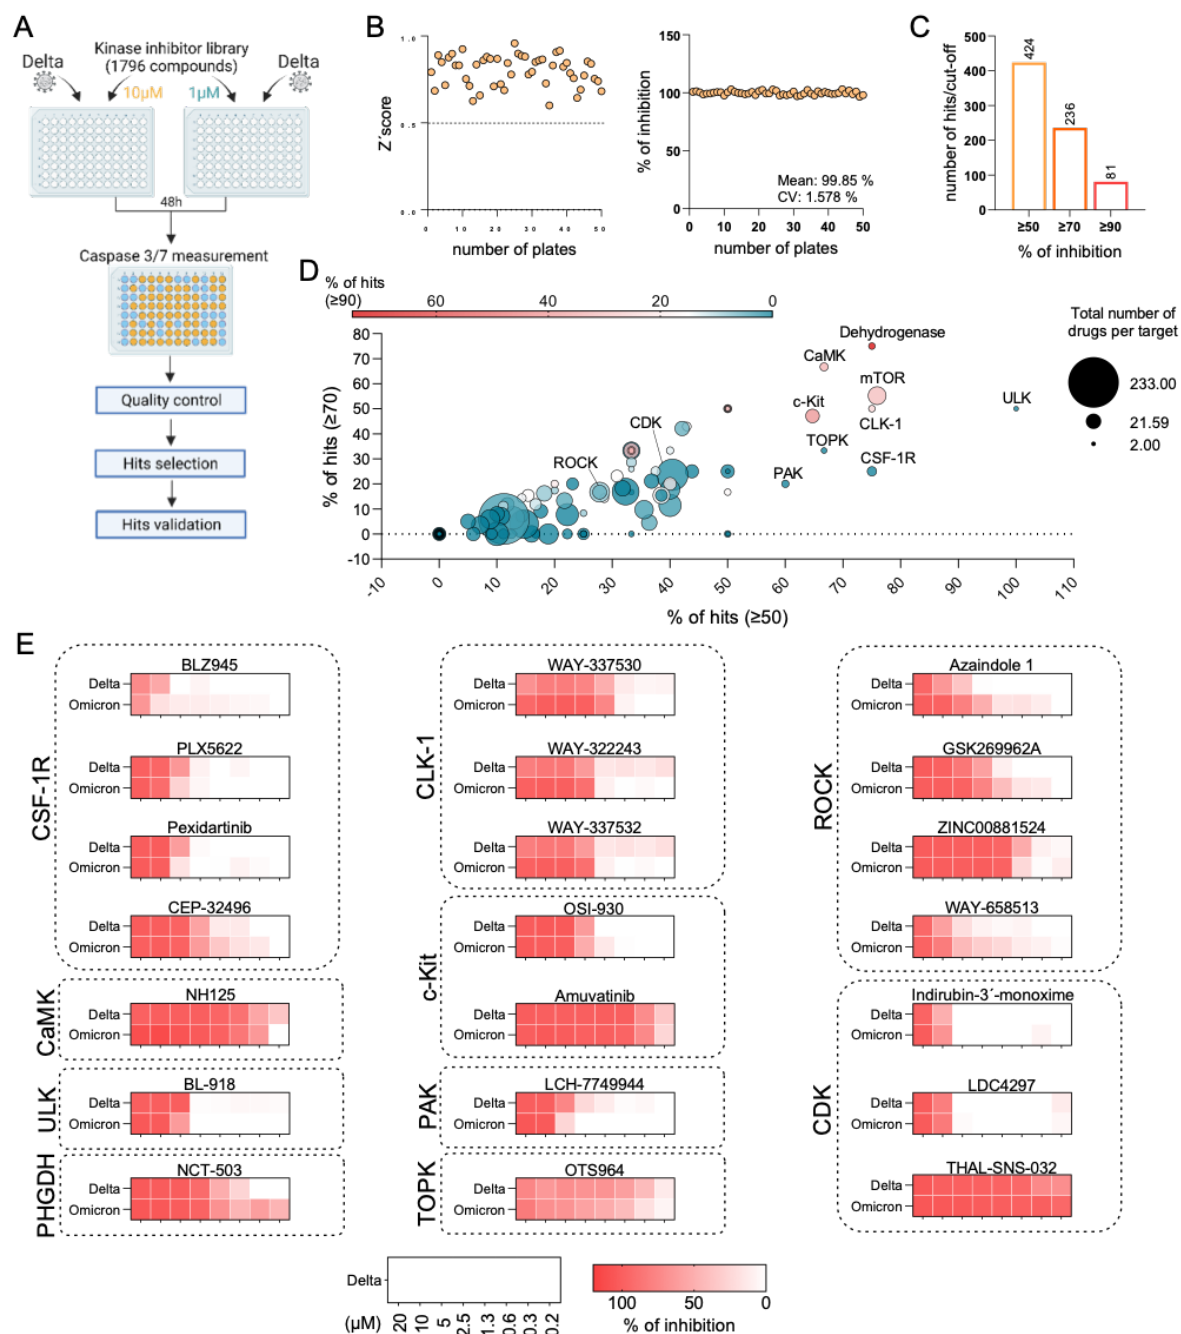

398

399 **Figure 5. Proof-of-concept screen for anti-SARS-CoV-2 drug candidates using**

400 **the Caco-2-F03 cell line platform and caspase 3/7 activity as read-out method. A)**

401 Overview of the proof-of-concept screen for anti-SARS-CoV-2 compounds using the

402 Kinase inhibitor library L-1200 (Selleckchem, Germany) containing 1796 compounds

403 (Selleckchem, Germany) in Delta (MOI 0.01)-infected Caco-2-F03 cells using caspase

404 3/7 activity as read-out 48h post infection. For the screen, every compound was tested

405 at a concentration of 10 and 1  $\mu$ M. 21 selected hits were then confirmed by determining  
406 drug-response curves. B) Quality controls, Z'scores served as quality controls (left).  
407 Only plates with a Z'score  $\geq 0.5$  were further analyzed. Remdesivir (10  $\mu$ M) was used  
408 as positive control on each plate and produced consistent results (right). C) Number of  
409 hits at different inhibition cut-offs. D) Visualization of the distribution of hits according  
410 to their targets. Targets for which inhibitors were selected for confirmation are  
411 indicated. E) Heatmaps of the anti-SARS-CoV-2 activity of 21 hits by the determination  
412 of dose-response in Delta and Omicron (MOI 0.01)-infected Caco-2-F03 cells using  
413 immunostaining for the viral S protein as read-out 24h post infection.

414  
415 All compounds were tested at a concentration of 10 $\mu$ M, which resulted in 81  
416 hits, when we considered  $\geq 90\%$  inhibition of caspase 3/7 activity as a cut-off (Figure  
417 5C). Most hits were identified among inhibitors that target dehydrogenases, CaMK,  
418 mTOR, ULK, CLK-1, TOPK, CSF-1R, and PAK (Figure 5D). CaMK, mTOR, ULK,  
419 TOPK (also known as PBK), and PAK had already been proposed as antiviral drug  
420 targets for SARS-CoV-2 [Shahinozzaman et al., 2020; Jamaly et al., 2021; Shang et  
421 al., 2021; Agrawal et al., 2022; Basile et al., 2022]. However, we could not find any  
422 information on potential anti-SARS-CoV-2 effects caused by CLK-1 or CSF-1R  
423 inhibition. We also included the phosphoglycerate dehydrogenase (PHGDH) inhibitor  
424 NCT-503 [Pacold et al., 2016; Hamanaka et al., 2018] in our confirmation experiments.  
425 Although dehydrogenases had been known to contribute to SARS-CoV-2 replication  
426 [Shang et al., 2021], PHGDH had not previously been shown to be involved.

427 In addition to inhibitors of the targets described above, ROCK and CDK  
428 inhibitors were also included into the confirmation experiments. ROCK was described  
429 to be involved in the SARS-CoV-2-induced suppression of the host cell interferon  
430 response [Zhang et al., 2021a]. CDK inhibitors had previously been shown to inhibit

431 SARS-CoV-2 replication [Gutierrez-Chamorro et al., 2021; Hahn et al., 2021]. The  
432 determination of dose-response curves for all of the 21 inhibitors using immunostaining  
433 for the SARS-CoV-2 S protein confirmed the results of the screen (Figure 5E, Suppl.  
434 Figure 6).

435

#### 436 **PHGDH inhibitor NCT-503 as anti-SARS-CoV-2 drug candidate**

437 Since PHGDH is a new potential antiviral drug target for the treatment of SARS-  
438 CoV-2 infection, we further investigated NCT-503. To investigate whether PHGDH  
439 inhibition is critical for NCT-503-mediated SARS-CoV-2 inhibition, we compared its  
440 effects and those of a chemically closely related analogue, which does not inhibit  
441 PHGDH and is commonly used as inactive NCT-503 control (Suppl. Figure 7A) [Pacold  
442 et al., 2016; Arlt et al., 2021], for antiviral activity. Only NCT-503 but not the inactive  
443 control inhibited Delta- and Omicron-induced caspase 3/7 activation indicating that the  
444 antiviral effects of NCT-503 are indeed mediated by PHGDH inhibition (Suppl. Figure  
445 7B).

446

Figure 6

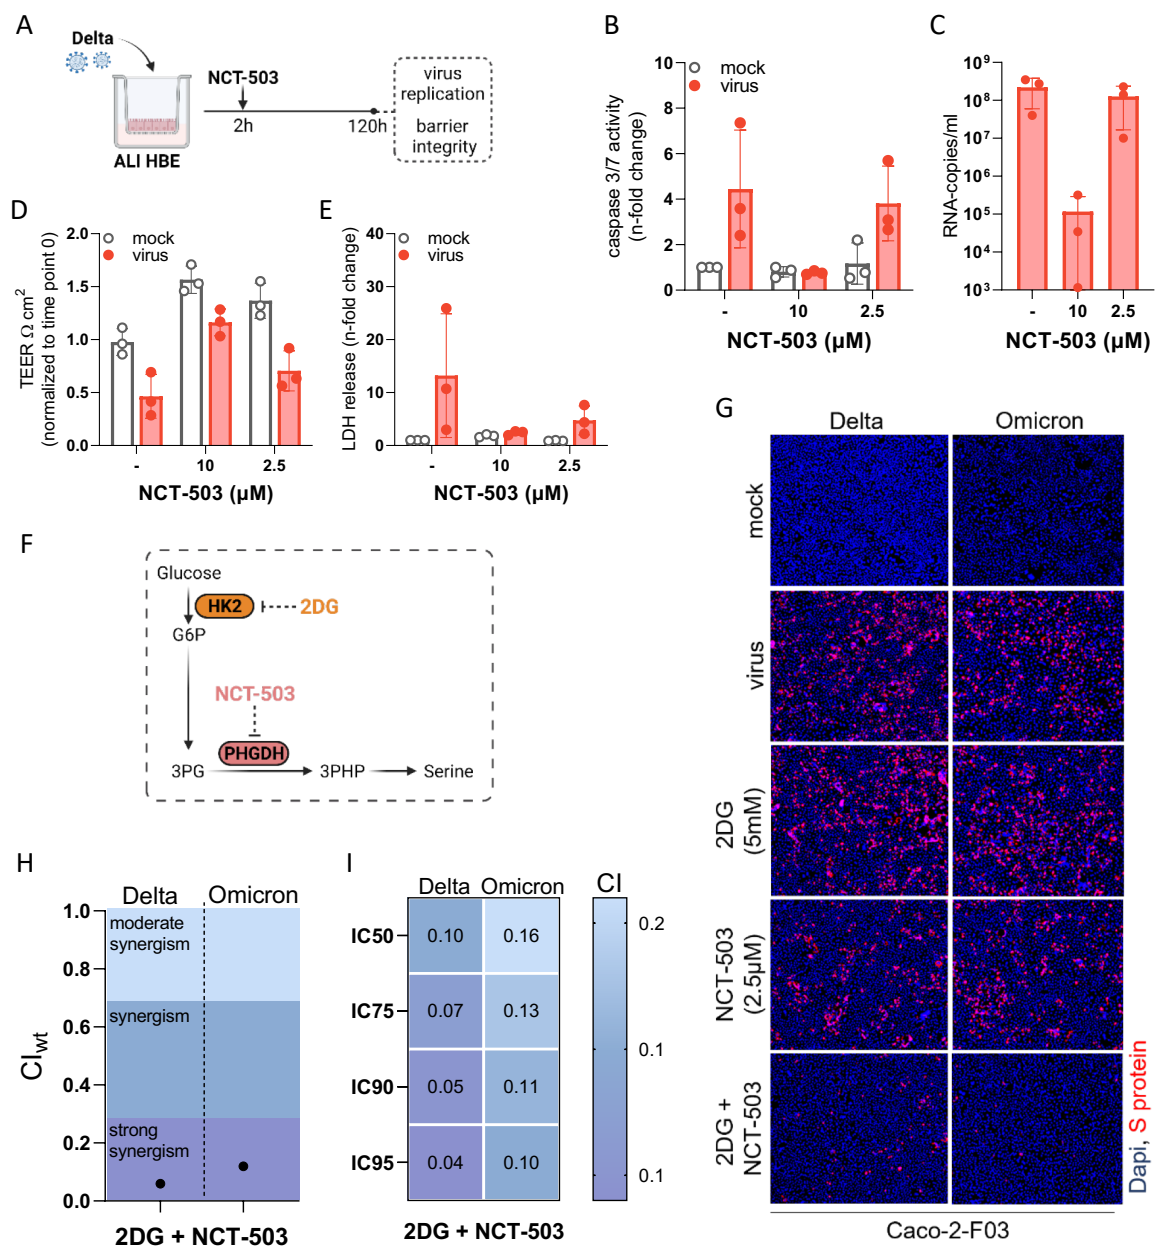

447

448 **Figure 6. Investigation of the anti-SARS-CoV-2 effects of the PHGDH inhibitor**

449 **NCT-503 alone or in combination with 2-Deoxy-D-glucose (2DG).** A) Scheme of

450 the testing of NCT-503 for anti-SARS-CoV-2 activity in air liquid interface (ALI) cultures

451 of primary human bronchial epithelial (HBE) cells. Effect of NCT-503 on (B) caspase

452 3/7 activity, (C) virus titers (determined as genomic RNA copy numbers by qPCR), (D)

453 transepithelial electrical resistance (TEER), and (E) LDH release in ALI HBE cultures

454 infected with Delta (MOI 1) 120h post infection. F) Anti-SARS-CoV-2 effects of NCT-



455 503 in combination with 2-Deoxy-D-glucose (2DG). Illustration of how NCT-503 and  
456 2DG can exert combined effects on a common metabolic pathway. G) Representative  
457 fluorescence images indicating the number of Delta and Omicron (MOI 0.01)-infected  
458 cells in NCT503 and/ or 2DG-treated Caco-2-F03 cultures 24h post infection. H) and  
459 I) Weighted combination indices (CIwt) determined by the method of Chou and Talalay  
460 [Chou, 2006] indicating a strong synergism of NCT-503 and 2DG.

461  
462 NCT-503 also inhibited SARS-CoV-2 replication in primary human bronchial  
463 epithelial cell air-liquid interface (ALI) cultures (Figure 6A) as indicated by SARS-CoV-  
464 2-induced caspase 3 activity (Figure 6B), viral titers (determined as copy numbers of  
465 genomic RNA by PCR) (Figure 6C), cell layer integrity (Figure 6D), and lack of SARS-  
466 CoV-2-induced cytotoxicity (as indicated by LDH release) (Figure 6E).

467 Taken together, NCT-503 is a novel antiviral drug candidate for the treatment of  
468 SARS-CoV-2 infections that inhibits virus replication via PHGDH inhibition and is  
469 effective in different model systems including primary human bronchial epithelial cell  
470 ALI cultures, the system considered to be most physiologically relevant [Mulay et al.,  
471 2021].

472

### 473 **NCT-503 in combination with 2-Deoxy-D-glucose (2DG)**

474 The discovery of PHGDH as novel antiviral drug target and of NCT-503 as  
475 antiviral drug candidate offers potential additional opportunities for combination  
476 therapies that display higher efficacy than either single treatment.

477 *De novo* serine synthesis is a side branch of glycolysis that includes the  
478 conversion of the glycolytic intermediate 3-phosphoglycerate (3PG) into 3-  
479 phosphohydroxypyruvate (3PHP) by PHGDH (Figure 6F) [Geeraerts et al., 2021]. The  
480 production of 3PG in the glycolytic cycle depends on the phosphorylation of glucose

481 into glucose-6-phosphate (G6P) by hexokinase II (HK2) as an initial step (Figure 6F)  
482 [Pajak et al., 2020]. Notably, the HK2 inhibitor 2-Deoxy-D-glucose (2DG) has already  
483 been shown to inhibit SARS-CoV-2 replication [Bojkova et al., 2020; Bojkova et al.,  
484 2021a]. Hence, we hypothesized that the combined inhibition of *de novo* serine  
485 synthesis by 2DG and NCT-503 may result in further enhanced antiviral effects (Figure  
486 6F).

487         Indeed, the combination of 2DG and NCT-503 resulted in stronger Delta and  
488 Omicron BA.1 inhibition than either drug alone (Figure 6G, Suppl. Figure 7C). The  
489 determination of combination indices (CIs) by the method of Chou and Talalay [Chou,  
490 2006] indicated a strong synergism of NCT-503 and 2DG against both SARS-CoV-2  
491 isolates (Figure 6H, Figure 6I).

492

493

## 494 **Discussion**

495           Here, we developed a novel screening assay for the identification of anti-SARS-  
496 CoV-2 compounds, based on using caspase 3/7 activity determined by the Caspase-  
497 Glo<sup>®</sup> Assay System as read-out indicating SARS-CoV-2 replication. This one step  
498 read-out assay can be used by the large number of laboratories, which are equipped  
499 with the required plate readers that are in common use. Moreover, the assay is widely  
500 (potentially universally) applicable to different SARS-CoV-2 strains and clinical isolates  
501 as well as cell culture systems, as indicated by our wide range of pilot experiments.  
502 Moreover, our findings show that caspase 3/7 activity can also be used to determine  
503 SARS-CoV-2 replication in neutralization assays determining the antibody response in  
504 the plasma of individuals and for the phenotypic resistance testing of virus variants.  
505 Notably, the caspase 3/7 assay also detects SARS-CoV-2 replication in cultivation  
506 systems that do not develop a CPE and in which viability assays such as the MTT  
507 assay and the Cell Titer Glo<sup>®</sup> Assay did not reflect SARS-CoV-2 replication.

508           For our proof-of-concept experiment for phenotypic resistance testing, we  
509 established a remdesivir-resistant SARS-CoV-2 strain by adapting the SARS-CoV-2  
510 strain FFM3 to replication in the presence of remdesivir. Our results confirmed previous  
511 observations [Szemiel et al., 2021; Yang et al., 2022] demonstrating that SARS-CoV-  
512 2 resistance formation against clinically approved antiviral drugs poses a relevant risk.  
513 Notably, the genetic sequence of our remdesivir-adapted SARS-CoV-2 strain would  
514 not have enabled us to identify this as a resistant strain by a genotypic approach, which  
515 emphasizes the potential need for effective phenotypic resistance testing platforms in  
516 the future.

517           In addition to identifying an easy-to-handle read-out assay for anti-SARS-CoV-  
518 2 agent screens, we were also interested in identifying a well-suited cell culture  
519 platform. We considered permanent cell lines to be the most promising candidates,

520 because they are readily available and require a minimum of handling. A number of  
521 continuous cell lines (e.g. A549-ACE, Calu-3, Vero, Caco-2) had already been used in  
522 different phenotypic screening approaches for the identification of antiviral drug  
523 candidates against SARS-CoV-2 [Dittmar et al., 2021; Ellinger et al., 2021; Xu et al.,  
524 2021]. Based on our comparison of different candidate cell lines, however, we  
525 identified Caco-2-F03 as the best platform, as it displayed susceptibility to the widest  
526 range of SARS-CoV-2 strains and isolates and was not affected by drug-induced  
527 phospholipidosis that has been shown to result in false-positive hits during the testing  
528 of anti-SARS-CoV-2 drug candidates [Tummino et al., 2021].

529 Notably, Caco-2 cells were (in contrast to Calu-3, A549, or Vero cells) shown to  
530 be highly susceptible to seasonal coronaviruses such as HCoV-229E or HCoV-OC43  
531 [Collins, 1990; Tang et al., 2005; Yoshikawa et al., 2010; Michaelis et al., 2011; Chan  
532 et al., 2013; Ramani et al., 2021]. In this context, we found here that the caspase 3/7  
533 assay also enabled the monitoring of HCoV-229E replication in Caco-2-F03 cells,  
534 indicating that this may also serve as a unique broad-spectrum drug screening platform  
535 for (seasonal) coronaviruses.

536 Our study also provided an explanation for the contradictory findings on the  
537 SARS-CoV-2 susceptibility of Caco-2 cells reported in previous studies [Bojkova et al.,  
538 2020; Bojkova et al., 2020b; Chu et al., 2020; Hoehl et al., 2020; Klann et al., 2020;  
539 Lee et al., 2020; Toptan et al., 2020; Bojkova et al., 2021; Ellinger et al., 2021; Gower  
540 et al., 2021; Widera et al., 2021; Yeung et al., 2021]. When we investigated newly  
541 acquired Caco-2 cell lines from different providers (DSMZ, CLS, Sigma) for SARS-  
542 CoV-2 susceptibility, they did indeed not present the level of SARS-CoV-2  
543 permissiveness that we find in our Caco-2-F03 cell line. The subsequent analysis of  
544 21 clonal sublines of the newly purchased lowly SARS-CoV-2-susceptible Caco-2 cell  
545 line from DSMZ (Caco-2A) resulted in a broad range of susceptibility phenotypes,

546 suggesting that a highly SARS-CoV-2-susceptible subpopulation has inadvertently  
547 become the dominant population in our Caco-2-F03 cell line. Notably, the susceptibility  
548 phenotype of Caco-2-F03 appears to be stable, as we have used this cell line for the  
549 cultivation of SARS-CoV and SARS-CoV-2 since 2003 [Cinatl et al., 2003; Cinatl et al.,  
550 2004]. Moreover, the SARS-CoV-2 susceptibility phenotype of Caco-2-F03 was  
551 maintained for a further 30 passages within the current study. Notably, such phenotypic  
552 differences between samples of the same cell line obtained from different sources is  
553 not surprising and has been described for different cell lines [Feichtinger et al., 2016;  
554 Ben-David et al., 2018; Liu et al., 2019].

555         Next, we used the caspase 3/7 activity assay in Caco-2-F03 cells to screen the  
556 Kinase Inhibitor Library (96-well)-L1200 (Selleck) for anti-SARS-CoV-2 drug  
557 candidates, which resulted in 81 hits that reduced SARS-CoV-2-induced caspase 3/7  
558 activity by  $\geq 90\%$ . These hits included inhibitors of known potential anti-SARS-CoV-2  
559 drug targets (CaMK, mTOR, ULK, TOPK, PAK, ROCK, CDK) [Shahinozzaman et al.,  
560 2020; Jamaly et al., 2021; Ellinger et al., 2021; Shang et al., 2021; Zhang et al., 2021b;  
561 Agrawal et al., 2022; Basile et al., 2022] and those that interfere with drug targets that  
562 had not previously been identified to be relevant during SARS-CoV-2 replication (CLK-  
563 1, CSF-1R). We determined dose response curves for 21 out of these 81 hit  
564 compounds using immunostaining for the viral S protein, which confirmed their anti-  
565 SARS-CoV-2 activities.

566         Among these hits, we further investigated the phosphoglycerate dehydrogenase  
567 (PHGDH) inhibitor NCT-503 [Pacold et al., 2016; Hamanaka et al., 2018], as it  
568 interferes with a dehydrogenase that had not previously been shown to be involved in  
569 SARS-CoV-2 replication. In addition to NCT-503, we tested a structurally closely  
570 related analogue that does not inhibit PHGDH [Pacold et al., 2016; Arlt et al., 2021].

571 This inactive NCT-503 analogue did not affect SARS-CoV-2 replication, indicating that  
572 the anti-SARS-CoV-2 effects of NCT-503 are caused by its effect on PHGDH.

573 PHGDH activity is critically involved in *de novo* serine synthesis [Geeraerts et  
574 al., 2021], a pathway downstream of the glycolytic cycle that depends on the  
575 phosphorylation of glucose into glucose-6-phosphate (G6P) by hexokinase II (HK2) as  
576 initial step [Pajak et al., 2020]. Since the HK2 inhibitor 2-Deoxy-D-glucose (2DG) has  
577 already been shown to inhibit SARS-CoV-2 replication [Bojkova et al., 2020; Bojkova  
578 et al., 2021a], we tested whether the combined interference with this pathway using  
579 NCT-503 and 2DG resulted in further increased antiviral effects. Indeed, the  
580 combination resulted in strongly synergistic anti-SARS-CoV-2 activity. Such antiviral  
581 combination therapies have been suggested to be of critical importance for the  
582 sustained control of virus outbreaks, as they are not only more effective but also  
583 anticipated to reduce and, ideally, prevent resistance formation [White et al., 2021].

584 In conclusion, we here present a novel phenotypic screening platform for the  
585 identification of drug candidates with activity against SARS-CoV-2 and other  
586 coronaviruses based on the determination of caspase 3/7 activity using the one-step  
587 Caspase-Glo<sup>®</sup> 3/7 Assay System as read-out. Caspase 3/7 activity is also a suitable  
588 read-out for neutralization assays and phenotypic resistance testing. The Caco-2-F03  
589 cell line was identified as the best-suited cell culture platform. It is susceptible to a  
590 particularly broad range of SARS-CoV-2 isolates and its susceptibility phenotype  
591 remains stable over many passages. Moreover, Caco-2-F03 is not affected by  
592 phospholipidosis, which is known to cause false-positive hits during the testing of  
593 potential anti-SARS-CoV-2 agents [Tummino et al., 2021]. Hence, the determination  
594 of caspase 3/7 activity in SARS-CoV-2-infected Caco-2-F03 cells represents a newly  
595 established screening platform that is easy-to-use also for groups without experience  
596 in drug discovery projects. A proof-of-concept screen of a kinase inhibitor library

597 containing 1796 compounds resulted in known and novel anti-SARS-CoV-2 drug  
598 targets. The PHGDH inhibitor NCT-503 was identified as novel antiviral drug  
599 candidate, whose activity was further increased by 2DG (an inhibitor of the PHGDH  
600 upstream HK2), which is under clinical development for the treatment of COVID-19  
601 treatment [Sahu & Kumar, 2021].

602

603

## 604 **Material and methods**

### 605 **Cell culture**

606 Caco-2A (DSMZ), Caco-2B (Sigma), Caco-2C (CLS), Vero (DSMZ), Calu-3  
607 (ATCC), and Caco-2-F03 (Resistant Cancer Cell Line collection,  
608 [https://research.kent.ac.uk/industrial-biotechnology-centre/the-resistant-cancer-cell-](https://research.kent.ac.uk/industrial-biotechnology-centre/the-resistant-cancer-cell-line-rccl-collection/)  
609 [line-rccl-collection/](https://research.kent.ac.uk/industrial-biotechnology-centre/the-resistant-cancer-cell-line-rccl-collection/)) were grown at 37 °C in minimal essential medium (MEM)  
610 supplemented with 10% fetal bovine serum (FBS), 100 IU/mL penicillin, and 100 µg/mL  
611 streptomycin. All culture reagents were purchased from Sigma. A549-ACE2  
612 (Invivogen) was grown in DMEM supplemented with 10% FBS, 2% L-glutamine, 100  
613 µg/ml normocin, 0.5 µg/ml puromycin, 100 IU/mL penicillin, and 100 µg/mL of  
614 streptomycin. All cell lines were regularly authenticated by short tandem repeat (STR)  
615 analysis and tested for mycoplasma contamination.

616 Primary bronchial epithelial cells were isolated from the lung explant tissue of a  
617 patient with lung emphysema as previously described [van Wetering et al., 2000]. For  
618 differentiation into air-liquid interface (ALI) cultures, cells were resuscitated, passaged  
619 once in PneumaCult-Ex Medium (StemCell technologies), and seeded on transwell  
620 inserts (12-well plate, Sarstedt) at  $4 \times 10^4$  cells/insert. After reaching confluence,  
621 medium on the apical side of the transwell insert was removed and medium in the  
622 basal chamber was replaced with PneumaCult ALI Maintenance Medium (StemCell  
623 Technologies) including Antibiotic/Antimycotic solution (Sigma Aldrich) and MycoZap  
624 Plus PR (Lonza). Criteria for successful differentiation were the development of ciliary  
625 movement, an increase in transepithelial electric resistance, and mucus production.

626 Human induced pluripotent stem cell-derived cardiomyocytes (hiPS-CMs) of  
627 two donors were obtained with an embryoid body-based protocol as previously  
628 described [Breckwoldt et al., 2017]. hiPS-CMs were cultured in RPMI/B27 medium at  
629 37 °C and 5 % CO<sub>2</sub> for 4 to 5 days prior to viral infection.



630 Primary human hepatocytes (PHHs) were isolated as previously described  
631 [Vondran et al., 2008] and were maintained in William's Medium E (PAN Biotech,  
632 Aidenbach, Germany) containing 10% fetal bovine serum (Biochrom, Cambridge, UK)  
633 and 10,000 U penicillin/streptomycin, 1% L-glutamine, 1% non-essential amino-acids,  
634 5mmol/L Hepes (Thermo Fisher Scientific, Schwerte, Germany), 2% dimethyl sulfoxide  
635 (DMSO, Roth, Karlsruhe, Germany), 5 µg/mL insulin, and 0.05 mmol/L hydrocortisone  
636 (Sigma Aldrich, Munich, Germany).

637

### 638 **Virus preparation and infection of different cell types**

639 Caco-2-F03 cells were used for the isolation SARS-CoV-2 variants applied in this  
640 study. Information on the following isolates is available from GenBank: D614 (SARS-  
641 CoV-2/FFM1, MT358638), G614 (SARS-CoV-2/FFM7, MT358643), Alpha (SARS-  
642 CoV-2/FFM-UK7931/2021, MZ427280), Beta (SARS-CoV-2/FFM-ZAF1/2021,  
643 MW822592), Delta (SARS-CoV-2/FFM-IND8424/2021, MZ315141), Zeta (SARS-CoV-  
644 2/FFMBRA1/2021, MW822593), Omicron (SARS-CoV-2/FFM-SIM0550/2021,  
645 OL800702). Additional isolates were not further characterized. SARS-CoV-2 stocks  
646 were cultivated for a maximum of three passages in Caco-2-F03 cells and stored at –  
647 80°C. SARS-CoV stocks were prepared on Caco-2-F03 cells as previously described  
648 [Cinatl et al., 2004]. MERS-CoV was obtained from BEI Resources (EMC/2012, NR-  
649 44260) and passaged once on Vero cells prior experiments. Viral stocks of HCoV-229E  
650 (ATCC no. CCL-137) were prepared using Caco-2-F03 cells. Virus titers were  
651 determined as TCID<sub>50</sub>/mL in confluent cells in 96-well microtiter plates.

652 Primary bronchial and nasal epithelial cells in ALI cultures were infected with  
653 SARS-CoV-2 from the apical site. The inoculum was incubated for 2 h, then removed  
654 and cells were washed three times with PBS. For testing of antiviral activity of drugs,

655 the compounds were added after the infection period from both the apical and the basal  
656 site. The apical medium was removed after one day.

657

### 658 **Caspase activity assay**

659 Caspase 3/7, 8 and 9 activity was measured using the Caspase-Glo assay kit  
660 (Promega, Madison, WI, USA), according to the manufacturer's instructions. Briefly,  
661 100  $\mu$ L of Caspase-Glo reagent were added to each well, mixed, and incubated at room  
662 temperature for 30 min. Luminescence intensity was measured using an Infinite M200  
663 microplate reader (Tecan).

664

### 665 **Viability assay**

666 Cell viability was measured by 3-(4,5-dimethylthiazol-2-yl)-2,5-  
667 diphenyltetrazolium bromide (MTT) dye reduction assay. 25  $\mu$ L of MTT solution (2  
668 mg/mL in PBS) were added per well, and the plates were incubated at 37 °C for 4 h.  
669 After this, the cells were lysed using 100  $\mu$ L of a buffer containing 20% sodium  
670 dodecylsulfate and 50% *N,N*-dimethylformamide with the pH adjusted to 4.7 at 37 °C  
671 for 4 h. Absorbance was determined at 560 nm (reference wavelength 620 nm) using  
672 a Tecan infinite M200 microplate reader (TECAN).

673 Alternatively, cell viability was determined using the CellTiter-Glo (Promega),  
674 which measures ATP production, according to the manufacturer's protocol.  
675 Luminescence was measured on a Tecan infinite M200 microplate reader (TECAN).

676

### 677 **Immunocytochemistry of viral antigen**

678 Cells were fixed with acetone:methanol (40:60) solution and immunostaining  
679 was performed using a monoclonal antibody directed against the spike (S) protein of

680 SARS-CoV-2 (1:1500, Sinobiological), which was detected with a peroxidase-  
681 conjugated anti-rabbit secondary antibody (1:1,000, Dianova), followed by addition of  
682 AEC substrate. The S positive area was scanned and quantified by the Bioreader®  
683 7000-F-Z-I microplate reader (Biosys). The results are expressed as percentage of  
684 inhibition relative to virus control which received no drug.

685

### 686 **Immunofluorescence labeling**

687 Cells were fixed with 3% PFA permeabilized with 0.1 % Triton X-100. Prior to  
688 primary antibody labeling, cells were blocked with 5% donkey serum in PBS or 1%  
689 BSA and 2% goat serum in PBS for 30 minutes at room temperature. Spike (S) protein  
690 was detected using a specific antibody (1:1500, Sinobiological) and an Alexa Fluor 488  
691 anti-rabbit secondary antibody (1:200, Invitrogen). The nucleus was labeled using  
692 DAPI (1:1000, Thermo Scientific). Cardiomyocytes were counterstained with Alexa  
693 Fluor™ 647 Phalloidin (1:100, #A22287, Invitrogen). Images were taken using  
694 Spark® Multitmode microplate reader (TECAN) at 10x magnification.

695

### 696 **Immunoblot assay**

697 Cells were lysed using Triton-X-100 sample buffer (Sigma-Aldrich), and proteins  
698 were separated by SDS-PAGE. Detection occurred by using specific antibodies  
699 against GAPDH (1:1000 dilution, #2275-PC-100, Trevigen), SARS-CoV-2 NP (1:1000  
700 dilution, #40143-R019, Sino Biological), ACE2 (1:500 dilution, #ab15348, Abcam), and  
701 TMPRSS2 (1:1000 dilution, Recombinant Anti-TMPRSS2 antibody [EPR3861],  
702 #ab92323, Abcam) followed by incubation with IRDye-labeled secondary antibodies  
703 (LI-COR Biotechnology, IRDye®800CW Goat anti-Rabbit, 926-32211, 1:40,000)  
704 according to the manufacturer's instructions. Protein bands were visualized by laser-

705 induced fluorescence using an infrared scanner for protein quantification (Odyssey, Li-  
706 Cor Biosciences, Bad Homburg, Germany).

707

## 708 **qRT-PCR**

709 SARS-CoV-2 RNA from cell culture supernatant samples was isolated using  
710 AVL buffer and the QIAamp Viral RNA Kit (QIAGEN) according to the manufacturer's  
711 instructions. Quantification of viral RNA was performed as previously described  
712 [Bojkova et al., 2020; Toptan et al., 2020] using primers targeting the RNA-dependent  
713 RNA polymerase (RdRp): RdRP\_SARSr-F2 (GTG ARA TGG TCA TGT GTG GCG G)  
714 and RdRP\_SARSr-R1 (CAR ATG TTA AAS ACA CTA TTA GCA TA). Standard curves  
715 were created using plasmid DNA (pEX-A128-RdRP) harboring the corresponding  
716 amplicon regions for RdRP target sequence according to GenBank Accession number  
717 NC\_045512. All quantification experiments have been carried out with biological  
718 replicates.

719

## 720 **Neutralization assay**

721 Serum of double mRNA-1273-vaccinated individuals was serially diluted and pre-  
722 incubated with 4000 TCID<sub>50</sub>/mL of SARS-CoV-2 variants at 37°C for 1 h prior transfer  
723 to Caco-2-F03 monolayers in 96 well plate. The neutralization titer was determined  
724 either by visual scoring of CPE 72 h post infection or caspase 3/7 activity  
725 measurement.

726

## 727 **Selection of drug-resistant variant**

728 SARS-CoV-2/FFM3 was serially passaged with increasing concentration  
729 (starting concentration - 500nM) of remdesivir in Caco-2-F03. Viral replication was

730 monitored by observation for any cytopathogenic effect present in the culture. Infected  
731 cultures were frozen at  $-80^{\circ}\text{C}$  and thawed once prior a passaging. Virus was serially  
732 passaged by using 1 aliquot of viral stock from the preceding passage to infect fresh  
733 Caco-2-F03 cells (MOI of 0.1) in the presence of increasing concentrations of  
734 compound for a total of 30 passages, resulting in a strain that could be readily passaged  
735 in the presence of remdesivir  $2\ \mu\text{M}$  (FFM3<sup>r</sup>REM).

736

### 737 **Sequencing**

738         Extracted nucleic acid was DNase treated, reverse transcribed, and randomly  
739 amplified using a Sequence-Independent Single-Primer Amplification (SISPA) method  
740 described previously [Lewandowski et al., 2019]. Illumina sequencing used the Nextera  
741 XT protocol with  $2 \times 150$ -bp paired-end sequencing on a MiSeq.

742

### 743 **Phospholipidosis quantification**

744         Phospholipidosis was assessed as previously described [Tummino et al., 2021].  
745 Cells were treated with hydroxychloroquine in the presence of  $7.5\ \mu\text{M}$   
746 nitrobenzoxadiazole-conjugated phosphoethanolamine (NBD-PE) (ThermoFisher).  
747 Images were taken and the fluorescence was quantified using a Spark<sup>®</sup> Multitmode  
748 microplate reader (TECAN).

749

### 750 **Screening assay**

751         The Kinase inhibitor library L-1200 (Selleckchem) containing 1796 compounds  
752 was tested in a proof-of-concept screen in Delta-infected Caco-2-F03 cells for the  
753 identification of antivirally active agents. Caco-2-F03 cells were seeded into 96-well  
754 plates (50,000 cells/well) and incubated at  $37^{\circ}\text{C}$  for 4 days. After the cells reached

755 confluence, the supernatant was replaced by 25  $\mu$ L/well of medium containing the  
756 ABCB1 inhibitor zosuquidar (final concentration 1  $\mu$ M), 25  $\mu$ L/well of medium  
757 containing kinase inhibitors (final concentration 10  $\mu$ M) in singlets, and 50  $\mu$ L/ well  
758 SARS-CoV-2 suspension (MOI 0.01). Remdesivir (10  $\mu$ M) was used as positive  
759 control. Plates were incubated at 37°C for 48h prior to the measurement of caspase  
760 3/7 activity as described above. For each plate the Z' score, a measure of statistical  
761 effect size and an index for assay quality control, was calculated by:  $Z' = 1 -$   
762  $(3*s.d.signal + 3*s.d.basal)/(Meansignal - Meanbasal)$ . Only plates with Z' score  $\geq 0.5$   
763 were further analyzed.

764

### 765 **Drug combination studies**

766 To evaluate antiviral activity of drug combinations, drugs were tested alone or  
767 in fixed combinations at 1:2 dilutions using monolayers of Caco-2-F03 cells infected  
768 with the indicated SARS-CoV-2 isolates at MOI 1. Antiviral effects were detected 24 h  
769 post infection by immunofluorescence staining for S protein. The calculation of IC50,  
770 IC75, IC90 and IC95 for single drugs and their combinations as well as combination  
771 indices (CIs) was performed using the software CalcuSyn (Biosoft) based on the  
772 method of Chou and Talalay [Chou, 2006]. The weighted average CI value ( $CI_{wt}$ ) was  
773 calculated according to the formula:  $CI_{wt} [CI_{50} + 2CI_{75} + 3CI_{90} + 4CI_{95}]/10$ .  $CI_{wt}$  values  
774 were calculated for mutually exclusive interactions where  $CI_{wt} < 1$  indicates synergism,  
775  $CI_{wt} = 1$  indicates additive effects, and  $CI_{wt} > 1$  suggest antagonism.

776

### 777 **Statistical analysis**

778 The results are expressed as the mean  $\pm$  standard deviation of at least three  
779 experiments. The Student's *t*-test was used for comparing two groups. Three and more

780 groups were compared by ANOVA. GraphPad Prism 9 was used to determine IC50

781 and CC50.

782

## 783 **References**

- 784 Agrawal P, Sambaturu N, Olgun G, Hannehalli S. A path-based analysis of infected  
785 cell line and COVID-19 patient transcriptome reveals novel potential targets and drugs  
786 against SARS-CoV-2. *Res Sq.* 2022 Mar 21;rs.3.rs-1474136. doi: 10.21203/rs.3.rs-  
787 1474136/v1.
- 788 Apaydın ÇB, Çınar G, Cihan-Üstündağ G. Small-molecule antiviral agents in ongoing  
789 clinical trials for COVID-19. *Curr Drug Targets.* 2021 Feb 14. doi:  
790 10.2174/1389450122666210215112150.
- 791 Arlt B, Mastrobuoni G, Wuenschel J, Astrahantseff K, Eggert A, Kempa S, Deubzer  
792 HE. Inhibiting PHGDH with NCT-503 reroutes glucose-derived carbons into the TCA  
793 cycle, independently of its on-target effect. *J Enzyme Inhib Med Chem.* 2021  
794 Dec;36(1):1282-1289. doi: 10.1080/14756366.2021.1935917.
- 795 Basile MS, Cavalli E, McCubrey J, Hernández-Bello J, Muñoz-Valle JF, Fagone P,  
796 Nicoletti F. The PI3K/Akt/mTOR pathway: A potential pharmacological target in  
797 COVID-19. *Drug Discov Today.* 2022 Mar;27(3):848-856. doi:  
798 10.1016/j.drudis.2021.11.002.
- 799 Ben-David U, Siranosian B, Ha G, Tang H, Oren Y, Hinohara K, Strathdee CA,  
800 Dempster J, Lyons NJ, Burns R, Nag A, Kugener G, Cimini B, Tsvetkov P, Maruvka  
801 YE, O'Rourke R, Garrity A, Tubelli AA, Bandopadhyay P, Tsherniak A, Vazquez F,  
802 Wong B, Birger C, Ghandi M, Thorner AR, Bittker JA, Meyerson M, Getz G, Beroukhim  
803 R, Golub TR. Genetic and transcriptional evolution alters cancer cell line drug  
804 response. *Nature.* 2018 Aug;560(7718):325-330. doi: 10.1038/s41586-018-0409-3.
- 805 Bielarz V, Willemart K, Avalosse N, De Swert K, Lotfi R, Lejeune N, Poulain F, Ninanne  
806 N, Gilloteaux J, Gillet N, Nicaise C. Susceptibility of neuroblastoma and glioblastoma  
807 cell lines to SARS-CoV-2 infection. *Brain Res.* 2021 May 1;1758:147344. doi:  
808 10.1016/j.brainres.2021.147344.



809 Bojkova D, Klann K, Koch B, Widera M, Krause D, Ciesek S, Cinatl J, Münch C.  
810 Proteomics of SARS-CoV-2-infected host cells reveals therapy targets. *Nature*. 2020  
811 Jul;583(7816):469-472. doi: 10.1038/s41586-020-2332-7.

812 Bojkova D, Wagner JUG, Shumliakivska M, Aslan GS, Saleem U, Hansen A, Luxán G,  
813 Günther S, Pham MD, Krishnan J, Harter PN, Ermel UH, Frangakis AS, Milting H,  
814 Zeiher AM, Klingel K, Cinatl J, Dendorfer A, Eschenhagen T, Tschöpe C, Ciesek S,  
815 Dimmeler S. SARS-CoV-2 infects and induces cytotoxic effects in human  
816 cardiomyocytes. *Cardiovasc Res*. 2020a Dec 1;116(14):2207-2215. doi:  
817 10.1093/cvr/cvaa267.

818 Bojkova D, Bechtel M, McLaughlin KM, McGreig JE, Klann K, Bellinghausen C, Rohde  
819 G, Jonigk D, Braubach P, Ciesek S, Münch C, Wass MN, Michaelis M, Cinatl J Jr.  
820 Aprotinin Inhibits SARS-CoV-2 Replication. *Cells*. 2020b Oct 30;9(11):2377. doi:  
821 10.3390/cells9112377.

822 Bojkova D, McGreig JE, McLaughlin KM, Masterson SG, Antczak M, Widera M,  
823 Krähling V, Ciesek S, Wass MN, Michaelis M, Cinatl J. Differentially conserved amino  
824 acid positions may reflect differences in SARS-CoV-2 and SARS-CoV behaviour.  
825 *Bioinformatics*. 2021 Feb 9;btab094. doi: 10.1093/bioinformatics/btab094.

826 Bojkova D, Rothenburger T, Ciesek S, Wass MN, Michaelis M, Cinatl J Jr. SARS-CoV-  
827 2 Omicron variant virus isolates are highly sensitive to interferon treatment. *Cell*  
828 *Discov*. 2022 May 10;8(1):42. doi: 10.1038/s41421-022-00408-z.

829 Breckwoldt K, Letuffe-Brenière D, Mannhardt I, Schulze T, Ulmer B, Werner T, Benzin  
830 A, Klampe B, Reinsch MC, Laufer S, Shibamiya A, Prondzynski M, Mearini G, Schade  
831 D, Fuchs S, Neuber C, Krämer E, Saleem U, Schulze ML, Rodriguez ML,  
832 Eschenhagen T, Hansen A. Differentiation of cardiomyocytes and generation of human  
833 engineered heart tissue. *Nat Protoc*. 2017 Jun;12(6):1177-1197. doi:  
834 10.1038/nprot.2017.033.

835 Caccuri F, Zani A, Messali S, Giovanetti M, Bugatti A, Campisi G, Filippini F, Scaltriti  
836 E, Ciccozzi M, Fiorentini S, Caruso A. A persistently replicating SARS-CoV-2 variant  
837 derived from an asymptomatic individual. *J Transl Med.* 2020 Sep 23;18(1):362. doi:  
838 10.1186/s12967-020-02535-1.

839 Chan JF, Chan KH, Choi GK, To KK, Tse H, Cai JP, Yeung ML, Cheng VC, Chen H,  
840 Che XY, Lau SK, Woo PC, Yuen KY. Differential cell line susceptibility to the emerging  
841 novel human betacoronavirus 2c EMC/2012: implications for disease pathogenesis  
842 and clinical manifestation. *J Infect Dis.* 2013 Jun 1;207(11):1743-52. doi:  
843 10.1093/infdis/jit123.

844 Chan KH, Yan MK, To KK, Lau SK, Woo PC, Cheng VC, Li WS, Chan JF, Tse H, Yuen  
845 KY. Use of the human colorectal adenocarcinoma (Caco-2) cell line for isolating  
846 respiratory viruses from nasopharyngeal aspirates. *J Med Virol.* 2013a May;85(5):874-  
847 9. doi: 10.1002/jmv.23538.

848 Chou TC. Theoretical basis, experimental design, and computerized simulation of  
849 synergism and antagonism in drug combination studies. *Pharmacol Rev.* 2006  
850 Sep;58(3):621-81. doi: 10.1124/pr.58.3.10.

851 Chu H, Chan JF, Yuen TT, Shuai H, Yuan S, Wang Y, Hu B, Yip CC, Tsang JO, Huang  
852 X, Chai Y, Yang D, Hou Y, Chik KK, Zhang X, Fung AY, Tsoi HW, Cai JP, Chan WM,  
853 Ip JD, Chu AW, Zhou J, Lung DC, Kok KH, To KK, Tsang OT, Chan KH, Yuen KY.  
854 Comparative tropism, replication kinetics, and cell damage profiling of SARS-CoV-2  
855 and SARS-CoV with implications for clinical manifestations, transmissibility, and  
856 laboratory studies of COVID-19: an observational study. *Lancet Microbe.* 2020  
857 May;1(1):e14-e23. doi: 10.1016/S2666-5247(20)30004-5.

858 Cinatl J, Morgenstern B, Bauer G, Chandra P, Rabenau H, Doerr HW. Treatment of  
859 SARS with human interferons. *Lancet.* 2003 Jul 26;362(9380):293-4. doi:  
860 10.1016/s0140-6736(03)13973-6.

861 Cinatl J Jr, Hoever G, Morgenstern B, Preiser W, Vogel JU, Hofmann WK, Bauer G,  
862 Michaelis M, Rabenau HF, Doerr HW. Infection of cultured intestinal epithelial cells  
863 with severe acute respiratory syndrome coronavirus. *Cell Mol Life Sci.* 2004  
864 Aug;61(16):2100-12. doi: 10.1007/s00018-004-4222-9.

865 Collins AR. Comparison of the replication of distinct strains of human coronavirus  
866 OC43 in organotypic human colon cells (Caco-2) and mouse intestine. *Adv Exp Med*  
867 *Biol.* 1990;276:497-503. doi: 10.1007/978-1-4684-5823-7\_69.

868 Connolly PF, Fearnhead HO. Viral hijacking of host caspases: an emerging category  
869 of pathogen-host interactions. *Cell Death Differ.* 2017 Aug;24(8):1401-1410. doi:  
870 10.1038/cdd.2017.59.

871 Dittmar M, Lee JS, Whig K, Segrist E, Li M, Kamalia B, Castellana L, Ayyanathan K,  
872 Cardenas-Diaz FL, Morrissey EE, Truitt R, Yang W, Jurado K, Samby K, Ramage H,  
873 Schultz DC, Cherry S. Drug repurposing screens reveal cell-type-specific entry  
874 pathways and FDA-approved drugs active against SARS-Cov-2. *Cell Rep.* 2021 Apr  
875 6;35(1):108959. doi: 10.1016/j.celrep.2021.108959.

876 Ellinger B, Bojkova D, Zaliani A, Cinatl J, Claussen C, Westhaus S, Keminer O,  
877 Reinshagen J, Kuzikov M, Wolf M, Geisslinger G, Gribbon P, Ciesek S. A SARS-CoV-  
878 2 cytopathicity dataset generated by high-content screening of a large drug  
879 repurposing collection. *Sci Data.* 2021 Feb 26;8(1):70. doi: 10.1038/s41597-021-  
880 00848-4.

881 Feichtinger J, Hernández I, Fischer C, Hanscho M, Auer N, Hackl M, Jadhav V,  
882 Baumann M, Krempf PM, Schmidl C, Farlik M, Schuster M, Merkel A, Sommer A, Heath  
883 S, Rico D, Bock C, Thallinger GG, Borth N. Comprehensive genome and epigenome  
884 characterization of CHO cells in response to evolutionary pressures and over time.  
885 *Biotechnol Bioeng.* 2016 Oct;113(10):2241-53. doi: 10.1002/bit.25990.

- 886 Fogh J, Fogh JM, Orfeo T. One hundred and twenty-seven cultured human tumor cell  
887 lines producing tumors in nude mice. *J Natl Cancer Inst.* 1977 Jul;59(1):221-6. doi:  
888 10.1093/jnci/59.1.221.
- 889 Gao J, Sun F. Drug discovery to treat COVID-19 two years after its outbreak. *Drug*  
890 *Discov Ther.* 2021;15(6):281-288. doi: 10.5582/ddt.2021.01302.
- 891 Garcia G Jr, Sharma A, Ramaiah A, Sen C, Purkayastha A, Kohn DB, Parcels MS,  
892 Beck S, Kim H, Bakowski MA, Kirkpatrick MG, Riva L, Wolff KC, Han B, Yuen C, Ulmert  
893 D, Purbey PK, Scumpia P, Beutler N, Rogers TF, Chatterjee AK, Gabriel G,  
894 Bartenschlager R, Gomperts B, Svendsen CN, Betz UAK, Damoiseaux RD,  
895 Arumugaswami V. Antiviral drug screen identifies DNA-damage response inhibitor as  
896 potent blocker of SARS-CoV-2 replication. *Cell Rep.* 2021 Apr 6;35(1):108940. doi:  
897 10.1016/j.celrep.2021.108940.
- 898 Gentile I, Schiano Moriello N. COVID-19 prophylaxis in immunosuppressed patients:  
899 Beyond vaccination. *PLoS Med.* 2022 Jan 28;19(1):e1003917. doi:  
900 10.1371/journal.pmed.1003917.
- 901 Geeraerts SL, Heylen E, De Keersmaecker K, Kampen KR. The ins and outs of serine  
902 and glycine metabolism in cancer. *Nat Metab.* 2021 Feb;3(2):131-141. doi:  
903 10.1038/s42255-020-00329-9.
- 904 Gower G, Picazo PI, Fumagalli M, Racimo F. Detecting adaptive introgression in  
905 human evolution using convolutional neural networks. *Elife.* 2021 May 25;10:e64669.  
906 doi: 10.7554/eLife.64669.
- 907 Gutierrez-Chamorro L, Felip E, Ezeonwumelu IJ, Margelí M, Ballana E. Cyclin-  
908 dependent Kinases as Emerging Targets for Developing Novel Antiviral Therapeutics.  
909 *Trends Microbiol.* 2021 Sep;29(9):836-848. doi: 10.1016/j.tim.2021.01.014.
- 910 Hahn F, Hamilton ST, Wangen C, Wild M, Kicuntod J, Brückner N, Follett JEL,  
911 Herrmann L, Kheimar A, Kaufer BB, Rawlinson WD, Tsogoeva SB, Marschall M.

912 Development of a PROTAC-Based Targeting Strategy Provides a Mechanistically  
913 Unique Mode of Anti-Cytomegalovirus Activity. *Int J Mol Sci.* 2021 Nov  
914 27;22(23):12858. doi: 10.3390/ijms222312858.

915 Hamanaka RB, Nigdelioglu R, Meliton AY, Tian Y, Witt LJ, O'Leary E, Sun KA, Woods  
916 PS, Wu D, Ansbro B, Ard S, Rohde JM, Dulin NO, Guzy RD, Mutlu GM. Inhibition of  
917 Phosphoglycerate Dehydrogenase Attenuates Bleomycin-induced Pulmonary  
918 Fibrosis. *Am J Respir Cell Mol Biol.* 2018 May;58(5):585-593. doi: 10.1165/rcmb.2017-  
919 0186OC.

920 He X, Quan S, Xu M, Rodriguez S, Goh SL, Wei J, Fridman A, Koeplinger KA, Carroll  
921 SS, Grobler JA, Espeseth AS, Olsen DB, Hazuda DJ, Wang D. Generation of SARS-  
922 CoV-2 reporter replicon for high-throughput antiviral screening and testing. *Proc Natl*  
923 *Acad Sci U S A.* 2021 Apr 13;118(15):e2025866118. doi: 10.1073/pnas.2025866118.

924 Hiscox JA, Khoo SH, Stewart JP, Owen A. Shutting the gate before the horse has  
925 bolted: is it time for a conversation about SARS-CoV-2 and antiviral drug resistance?  
926 *J Antimicrob Chemother.* 2021 Aug 12;76(9):2230-2233. doi: 10.1093/jac/dkab189.

927 Hoehl S, Rabenau H, Berger A, Kortenbusch M, Cinatl J, Bojkova D, Behrens P,  
928 Böddinghaus B, Götsch U, Naujoks F, Neumann P, Schork J, Tiarks-Jungk P, Walczok  
929 A, Eickmann M, Vehreschild MJGT, Kann G, Wolf T, Gottschalk R, Ciesek S. Evidence  
930 of SARS-CoV-2 Infection in Returning Travelers from Wuhan, China. *N Engl J Med.*  
931 2020 Mar 26;382(13):1278-1280. doi: 10.1056/NEJMc2001899.

932 Jamaly S, Tsokos MG, Bhargava R, Brook OR, Hecht JL, Abdi R, Moulton VR, Satyam  
933 A, Tsokos GC. Complement activation and increased expression of Syk, mucin-1 and  
934 CaMK4 in kidneys of patients with COVID-19. *Clin Immunol.* 2021 Aug;229:108795.  
935 doi: 10.1016/j.clim.2021.108795.

936 Klann K, Bojkova D, Tascher G, Ciesek S, Münch C, Cinatl J. Growth Factor Receptor  
937 Signaling Inhibition Prevents SARS-CoV-2 Replication. *Mol Cell*. 2020 Oct  
938 1;80(1):164-174.e4. doi: 10.1016/j.molcel.2020.08.006.

939 Lee S, Yoon GY, Myoung J, Kim SJ, Ahn DG. Robust and persistent SARS-CoV-2  
940 infection in the human intestinal brush border expressing cells. *Emerg Microbes Infect*.  
941 2020 Dec;9(1):2169-2179. doi: 10.1080/22221751.2020.1827985.

942 Lewandowski K, Xu Y, Pullan ST, Lumley SF, Foster D, Sanderson N, Vaughan A,  
943 Morgan M, Bright N, Kavanagh J, Vipond R, Carroll M, Marriott AC, Gooch KE,  
944 Andersson M, Jeffery K, Peto TEA, Crook DW, Walker AS, Matthews PC.  
945 Metagenomic Nanopore Sequencing of Influenza Virus Direct from Clinical Respiratory  
946 Samples. *J Clin Microbiol*. 2019 Dec 23;58(1):e00963-19. doi: 10.1128/JCM.00963-  
947 19.

948 Li S, Zhang Y, Guan Z, Li H, Ye M, Chen X, Shen J, Zhou Y, Shi ZL, Zhou P, Peng K.  
949 SARS-CoV-2 triggers inflammatory responses and cell death through caspase-8  
950 activation. *Signal Transduct Target Ther*. 2020 Oct 9;5(1):235. doi: 10.1038/s41392-  
951 020-00334-0.

952 Liao Y, Li X, Mou T, Zhou X, Li D, Wang L, Zhang Y, Dong X, Zheng H, Guo L, Liang  
953 Y, Jiang G, Fan S, Xu X, Xie Z, Chen H, Liu L, Li Q. Distinct infection process of SARS-  
954 CoV-2 in human bronchial epithelial cell lines. *J Med Virol*. 2020 Nov;92(11):2830-  
955 2838. doi: 10.1002/jmv.26200.

956 Liu Y, Mi Y, Mueller T, Kreibich S, Williams EG, Van Drogen A, Borel C, Frank M,  
957 Germain PL, Bludau I, Mehnert M, Seifert M, Emmenlauer M, Sorg I, Bezrukov F, Bena  
958 FS, Zhou H, Dehio C, Testa G, Saez-Rodriguez J, Antonarakis SE, Hardt WD,  
959 Aebersold R. Multi-omic measurements of heterogeneity in HeLa cells across  
960 laboratories. *Nat Biotechnol*. 2019 Mar;37(3):314-322. doi: 10.1038/s41587-019-0037-  
961 y.

962 Michaelis M, Doerr HW, Cinatl J Jr. Investigation of the influence of EPs® 7630, a  
963 herbal drug preparation from *Pelargonium sidoides*, on replication of a broad panel of  
964 respiratory viruses. *Phytomedicine*. 2011 Mar 15;18(5):384-6. doi:  
965 10.1016/j.phymed.2010.09.008.

966 Mulay A, Konda B, Garcia G Jr, Yao C, Beil S, Villalba JM, Koziol C, Sen C,  
967 Purkayastha A, Kolls JK, Pociask DA, Pessina P, de Aja JS, Garcia-de-Alba C, Kim  
968 CF, Gomperts B, Arumugaswami V, Stripp BR. SARS-CoV-2 infection of primary  
969 human lung epithelium for COVID-19 modeling and drug discovery. *Cell Rep*. 2021  
970 May 4;35(5):109055. doi: 10.1016/j.celrep.2021.109055.

971 Ogando NS, Dalebout TJ, Zevenhoven-Dobbe JC, Limpens RWAL, van der Meer Y,  
972 Caly L, Druce J, de Vries JJC, Kikkert M, Bárcena M, Sidorov I, Snijder EJ. SARS-  
973 coronavirus-2 replication in Vero E6 cells: replication kinetics, rapid adaptation and  
974 cytopathology. *J Gen Virol*. 2020 Sep;101(9):925-940. doi: 10.1099/jgv.0.001453.

975 Pacold ME, Brimacombe KR, Chan SH, Rohde JM, Lewis CA, Swier LJ, Possemato  
976 R, Chen WW, Sullivan LB, Fiske BP, Cho S, Freinkman E, Birsoy K, Abu-Remaileh M,  
977 Shaul YD, Liu CM, Zhou M, Koh MJ, Chung H, Davidson SM, Luengo A, Wang AQ,  
978 Xu X, Yasgar A, Liu L, Rai G, Westover KD, Vander Heiden MG, Shen M, Gray NS,  
979 Boxer MB, Sabatini DM. A PHGDH inhibitor reveals coordination of serine synthesis  
980 and one-carbon unit fate. *Nat Chem Biol*. 2016 Jun;12(6):452-8. doi:  
981 10.1038/nchembio.2070.

982 Pajak B, Siwiak E, Sołtyka M, Priebe A, Zieliński R, Fokt I, Ziemniak M, Jaśkiewicz A,  
983 Borowski R, Domoradzki T, Priebe W. 2-Deoxy-d-Glucose and Its Analogs: From  
984 Diagnostic to Therapeutic Agents. *Int J Mol Sci*. 2019 Dec 29;21(1):234. doi:  
985 10.3390/ijms21010234.

986 Ramani R, Laplante JM, Church TM, Farrell GM, Lamson DM, St George K. CACO-2  
987 cells: A continuous cell line with sensitive and broad-spectrum utility for respiratory

988 virus culture. J Virol Methods. 2021 Jul;293:114120. doi:  
989 10.1016/j.jviromet.2021.114120.

990 Ramirez S, Fernandez-Antunez C, Galli A, Underwood A, Pham LV, Ryberg LA, Feng  
991 S, Pedersen MS, Mikkelsen LS, Belouzard S, Dubuisson J, Sølund C, Weis N,  
992 Gottwein JM, Fahnøe U, Bukh J. Overcoming Culture Restriction for SARS-CoV-2 in  
993 Human Cells Facilitates the Screening of Compounds Inhibiting Viral Replication.  
994 Antimicrob Agents Chemother. 2021 Jun 17;65(7):e0009721. doi:  
995 10.1128/AAC.00097-21.

996 Reid MA, Allen AE, Liu S, Liberti MV, Liu P, Liu X, Dai Z, Gao X, Wang Q, Liu Y, Lai L,  
997 Locasale JW. Serine synthesis through PHGDH coordinates nucleotide levels by  
998 maintaining central carbon metabolism. Nat Commun. 2018 Dec 21;9(1):5442. doi:  
999 10.1038/s41467-018-07868-6.

1000 Reigel F. Isolation of human pathogenic viruses from clinical material on CaCo2 cells.  
1001 J Virol Methods. 1985 Dec;12(3-4):323-7. doi: 10.1016/0166-0934(85)90143-0.

1002 Ren Y, Shu T, Wu D, Mu J, Wang C, Huang M, Han Y, Zhang XY, Zhou W, Qiu Y,  
1003 Zhou X. The ORF3a protein of SARS-CoV-2 induces apoptosis in cells. Cell Mol  
1004 Immunol. 2020 Aug;17(8):881-883. doi: 10.1038/s41423-020-0485-9.

1005 Riva L, Yuan S, Yin X, Martin-Sancho L, Matsunaga N, Pache L, Burgstaller-  
1006 Muehlbacher S, De Jesus PD, Teriete P, Hull MV, Chang MW, Chan JF, Cao J, Poon  
1007 VK, Herbert KM, Cheng K, Nguyen TH, Rubanov A, Pu Y, Nguyen C, Choi A,  
1008 Rathnasinghe R, Schotsaert M, Miorin L, Dejosez M, Zwaka TP, Sit KY, Martinez-  
1009 Sobrido L, Liu WC, White KM, Chapman ME, Lendy EK, Glynne RJ, Albrecht R, Rupp  
1010 E, Mesecar AD, Johnson JR, Benner C, Sun R, Schultz PG, Su AI, García-Sastre A,  
1011 Chatterjee AK, Yuen KY, Chanda SK. Discovery of SARS-CoV-2 antiviral drugs  
1012 through large-scale compound repurposing. Nature. 2020 Oct;586(7827):113-119. doi:  
1013 10.1038/s41586-020-2577-1.



- 1014 Sahu KK, Kumar R. Role of 2-Deoxy-D-Glucose (2-DG) in COVID-19 disease: A  
1015 potential game-changer. *J Family Med Prim Care*. 2021 Oct;10(10):3548-3552. doi:  
1016 10.4103/jfmprc.jfmprc\_1338\_21.
- 1017 Shahinozzaman M, Basak B, Emran R, Rozario P, Obanda DN. Artepillin C: A  
1018 comprehensive review of its chemistry, bioavailability, and pharmacological properties.  
1019 *Fitoterapia*. 2020 Nov;147:104775. doi: 10.1016/j.fitote.2020.104775.
- 1020 Shang C, Zhuang X, Zhang H, Li Y, Zhu Y, Lu J, Ge C, Cong J, Li T, Li N, Tian M, Jin  
1021 N, Li X. Inhibition of Autophagy Suppresses SARS-CoV-2 Replication and Ameliorates  
1022 Pneumonia in hACE2 Transgenic Mice and Xenografted Human Lung Tissues. *J Virol*.  
1023 2021 Nov 23;95(24):e0153721. doi: 10.1128/JVI.01537-21.
- 1024 Shiffman ML, Pockros P, McHutchison JG, Schiff ER, Morris M, Burgess G. Clinical  
1025 trial: the efficacy and safety of oral PF-03491390, a pancaspase inhibitor - a  
1026 randomized placebo-controlled study in patients with chronic hepatitis C. *Aliment*  
1027 *Pharmacol Ther*. 2010 May;31(9):969-78. doi: 10.1111/j.1365-2036.2010.04264.x.
- 1028 Simonis A, Theobald SJ, Fätkenheuer G, Rybniker J, Malin JJ. A comparative analysis  
1029 of remdesivir and other repurposed antivirals against SARS-CoV-2. *EMBO Mol Med*.  
1030 2021 Jan 11;13(1):e13105. doi: 10.15252/emmm.202013105.
- 1031 Szemiel AM, Merits A, Orton RJ, MacLean OA, Pinto RM, Wickenhagen A, Lieber G,  
1032 Turnbull ML, Wang S, Furnon W, Suarez NM, Mair D, da Silva Filipe A, Willett BJ,  
1033 Wilson SJ, Patel AH, Thomson EC, Palmarini M, Kohl A, Stewart ME. In vitro selection  
1034 of Remdesivir resistance suggests evolutionary predictability of SARS-CoV-2. *PLoS*  
1035 *Pathog*. 2021 Sep 17;17(9):e1009929. doi: 10.1371/journal.ppat.1009929.
- 1036 Tang BS, Chan KH, Cheng VC, Woo PC, Lau SK, Lam CC, Chan TL, Wu AK, Hung  
1037 IF, Leung SY, Yuen KY. Comparative host gene transcription by microarray analysis  
1038 early after infection of the Huh7 cell line by severe acute respiratory syndrome

- 1039 coronavirus and human coronavirus 229E. *J Virol.* 2005 May;79(10):6180-93. doi:  
1040 10.1128/JVI.79.10.6180-6193.2005.
- 1041 Thi Nhu Thao T, Labroussaa F, Ebert N, V'kovski P, Stalder H, Portmann J, Kelly J,  
1042 Steiner S, Holwerda M, Kratzel A, Gultom M, Schmied K, Laloli L, Hüsser L, Wider M,  
1043 Pfaender S, Hirt D, Cippà V, Crespo-Pomar S, Schröder S, Muth D, Niemeyer D,  
1044 Corman VM, Müller MA, Drosten C, Dijkman R, Jores J, Thiel V. Rapid reconstruction  
1045 of SARS-CoV-2 using a synthetic genomics platform. *Nature.* 2020  
1046 Jun;582(7813):561-565. doi: 10.1038/s41586-020-2294-9.
- 1047 Toptan T, Hoehl S, Westhaus S, Bojkova D, Berger A, Rotter B, Hoffmeier K, Cinatl J  
1048 Jr, Ciesek S, Widera M. Optimized qRT-PCR Approach for the Detection of Intra- and  
1049 Extra-Cellular SARS-CoV-2 RNAs. *Int J Mol Sci.* 2020 Jun 20;21(12):4396. doi:  
1050 10.3390/ijms21124396.
- 1051 Touret F, Gilles M, Barral K, Nougairède A, van Helden J, Decroly E, de Lamballerie  
1052 X, Coutard B. In vitro screening of a FDA approved chemical library reveals potential  
1053 inhibitors of SARS-CoV-2 replication. *Sci Rep.* 2020 Aug 4;10(1):13093. doi:  
1054 10.1038/s41598-020-70143-6.
- 1055 Tummino TA, Rezelj VV, Fischer B, Fischer A, O'Meara MJ, Monel B, Vallet T, White  
1056 KM, Zhang Z, Alon A, Schadt H, O'Donnell HR, Lyu J, Rosales R, McGovern BL,  
1057 Rathnasinghe R, Jangra S, Schotsaert M, Galarneau JR, Krogan NJ, Urban L, Shokat  
1058 KM, Kruse AC, García-Sastre A, Schwartz O, Moretti F, Vignuzzi M, Pognan F,  
1059 Shoichet BK. Drug-induced phospholipidosis confounds drug repurposing for SARS-  
1060 CoV-2. *Science.* 2021 Jul 30;373(6554):541-547. doi: 10.1126/science.abi4708.
- 1061 Van Damme E, De Meyer S, Bojkova D, Ciesek S, Cinatl J, De Jonghe S, Jochmans  
1062 D, Leyssen P, Buyck C, Neyts J, Van Loock M. In vitro activity of itraconazole against  
1063 SARS-CoV-2. *J Med Virol.* 2021 Jul;93(7):4454-4460. doi: 10.1002/jmv.26917.

1064 van Wetering S, van der Linden AC, van Sterkenburg MA, de Boer WI, Kuijpers AL,  
1065 Schalkwijk J, Hiemstra PS. Regulation of SLPI and elafin release from bronchial  
1066 epithelial cells by neutrophil defensins. *Am J Physiol Lung Cell Mol Physiol*. 2000  
1067 Jan;278(1):L51-8. doi: 10.1152/ajplung.2000.278.1.L51.

1068 Vondran FW, Katenz E, Schwartlander R, Morgul MH, Raschzok N, Gong X, Cheng  
1069 X, Kehr D, Sauer IM. Isolation of primary human hepatocytes after partial hepatectomy:  
1070 criteria for identification of the most promising liver specimen. *Artif Organs*. 2008  
1071 Mar;32(3):205-13. doi: 10.1111/j.1525-1594.2007.00524.x.

1072 White JM, Schiffer JT, Bender Ignacio RA, Xu S, Kainov D, Ianevski A, Aittokallio T,  
1073 Frieman M, Olinger GG, Polyak SJ. Drug Combinations as a First Line of Defense  
1074 against Coronaviruses and Other Emerging Viruses. *mBio*. 2021 Dec  
1075 21;12(6):e0334721. doi: 10.1128/mbio.03347-21.

1076 Widera M, Mühlemann B, Corman VM, Toptan T, Beheim-Schwarzbach J, Kohmer N,  
1077 Schneider J, Berger A, Veith T, Pallas C, Bleicker T, Goetsch U, Tesch J, Gottschalk  
1078 R, Jones TC, Ciesek S, Drosten C. Surveillance of SARS-CoV-2 in Frankfurt am Main  
1079 from October to December 2020 Reveals High Viral Diversity Including Spike Mutation  
1080 N501Y in B.1.1.70 and B.1.1.7. *Microorganisms*. 2021 Apr 2;9(4):748. doi:  
1081 10.3390/microorganisms9040748.

1082 Wurtz N, Penant G, Jardot P, Duclos N, La Scola B. Culture of SARS-CoV-2 in a panel  
1083 of laboratory cell lines, permissivity, and differences in growth profile. *Eur J Clin  
1084 Microbiol Infect Dis*. 2021 Mar;40(3):477-484. doi: 10.1007/s10096-020-04106-0.

1085 Xie X, Muruato AE, Zhang X, Lokugamage KG, Fontes-Garfias CR, Zou J, Liu J, Ren  
1086 P, Balakrishnan M, Cihlar T, Tseng CK, Makino S, Menachery VD, Bilello JP, Shi PY.  
1087 A nanoluciferase SARS-CoV-2 for rapid neutralization testing and screening of anti-  
1088 infective drugs for COVID-19. *Nat Commun*. 2020 Oct 15;11(1):5214. doi:  
1089 10.1038/s41467-020-19055-7.

- 1090 Yan K, Rawle DJ, Le TT, Suhrbier A. Simple rapid in vitro screening method for SARS-  
1091 CoV-2 anti-virals that identifies potential cytotoxicity-associated false positives. *Virology*.  
1092 2021 Jun 9;18(1):123. doi: 10.1186/s12985-021-01587-z.
- 1093 Yang KS, Leeuwon SZ, Xu S, Liu WR. Evolutionary and Structural Insights about  
1094 Potential SARS-CoV-2 Evasion of Nirmatrelvir. *J Med Chem*. 2022 Jun  
1095 22:acs.jmedchem.2c00404. doi: 10.1021/acs.jmedchem.2c00404.
- 1096 Yeung ML, Teng JLL, Jia L, Zhang C, Huang C, Cai JP, Zhou R, Chan KH, Zhao H,  
1097 Zhu L, Siu KL, Fung SY, Yung S, Chan TM, To KK, Chan JF, Cai Z, Lau SKP, Chen  
1098 Z, Jin DY, Woo PCY, Yuen KY. Soluble ACE2-mediated cell entry of SARS-CoV-2 via  
1099 interaction with proteins related to the renin-angiotensin system. *Cell*. 2021 Apr  
1100 15;184(8):2212-2228.e12. doi: 10.1016/j.cell.2021.02.053.
- 1101 Yoshikawa T, Hill TE, Yoshikawa N, Popov VL, Galindo CL, Garner HR, Peters CJ,  
1102 Tseng CT. Dynamic innate immune responses of human bronchial epithelial cells to  
1103 severe acute respiratory syndrome-associated coronavirus infection. *PLoS One*. 2010  
1104 Jan 15;5(1):e8729. doi: 10.1371/journal.pone.0008729.
- 1105 Zhang JH, Chung TD, Oldenburg KR. A Simple Statistical Parameter for Use in  
1106 Evaluation and Validation of High Throughput Screening Assays. *J Biomol Screen*.  
1107 1999;4(2):67-73. doi: 10.1177/108705719900400206.
- 1108 Zhang ZR, Zhang YN, Li XD, Zhang HQ, Xiao SQ, Deng F, Yuan ZM, Ye HQ, Zhang  
1109 B. A cell-based large-scale screening of natural compounds for inhibitors of SARS-  
1110 CoV-2. *Signal Transduct Target Ther*. 2020 Oct 3;5(1):218. doi: 10.1038/s41392-020-  
1111 00343-z.
- 1112 Zhang Y, Banga Ndzouboukou JL, Gan M, Lin X, Fan X. Immune Evasive Effects of  
1113 SARS-CoV-2 Variants to COVID-19 Emergency Used Vaccines. *Front Immunol*. 2021  
1114 Nov 22;12:771242. doi: 10.3389/fimmu.2021.771242.

1115 Zhang C, Li W, Lei X, Xie Z, Qi L, Wang H, Xiao X, Xiao J, Zheng Y, Dong C, Zheng  
1116 X, Chen S, Chen J, Sun B, Qin J, Zhai Q, Li J, Wei B, Wang J, Wang H. Targeting  
1117 lysophospholipid acid receptor 1 and ROCK kinases promotes antiviral innate  
1118 immunity. *Sci Adv.* 2021a Sep 17;7(38):eabb5933. doi: 10.1126/sciadv.abb5933.  
1119 Zhao H, Lu L, Peng Z, Chen LL, Meng X, Zhang C, Ip JD, Chan WM, Chu AW, Chan  
1120 KH, Jin DY, Chen H, Yuen KY, To KK. SARS-CoV-2 Omicron variant shows less  
1121 efficient replication and fusion activity when compared with Delta variant in TMPRSS2-  
1122 expressed cells. *Emerg Microbes Infect.* 2022 Dec;11(1):277-283. doi:  
1123 10.1080/22221751.2021.2023329.  
1124  
1125  
1126
